## 23 **Abstract**

24 Pioneer transcription factors (TFs) are a special category of TFs with the capacity to bind to  
25 closed chromatin regions in which DNA is wrapped around histones and often highly  
26 methylated. Subsequently, they are able to modify the chromatin state to initiate gene  
27 expression. In plants, LEAFY (LFY) is a master floral regulator and has been suggested to act  
28 as a pioneer TF in Arabidopsis. Here, we demonstrate that LFY is able to bind both methylated  
29 and non-methylated DNA using a combination of *in vitro* genome-wide binding experiments  
30 and structural modeling. Comparisons between regions bound by LFY *in vivo* and chromatin  
31 accessibility data suggest that LFY binds a subset of regions occupied by nucleosomes. We  
32 confirm that LFY is able to bind nucleosomal DNA *in vitro* using reconstituted nucleosomes.  
33 Finally, we show that constitutive LFY expression in seedling tissues is sufficient to induce  
34 chromatin accessibility in the LFY direct target genes, *APETALAI* and *AGAMOUS*. Taken  
35 together, our study suggests that LFY possesses key pioneer TF features that contribute to  
36 launch the floral gene expression program.

## 37 **Introduction**

38 Proper gene regulation is essential to all living organisms, controlling processes from basic  
39 development to environmental response. Gene regulation requires the finely orchestrated  
40 activity of transcription factors (TFs) that recognize specific DNA sequences in gene regulatory  
41 regions and activate or repress transcription of their target genes. While the binding of most  
42 TFs to DNA is restricted to accessible regions of the genome, a specific type of TF, called a  
43 “pioneer”, is able to access its cognate binding site even in closed, nucleosome-rich chromatin  
44 regions (Magnani et al., 2011; Iwafuchi-Doi and Zaret, 2014; Iwafuchi-Doi and Zaret, 2016;  
45 Zaret, 2020). The ability to bind nucleosomal DNA *in vivo* and *in vitro* is a defining  
46 characteristic of pioneer TFs and has been well-established for diverse mammalian pioneer TFs  
47 (Fernandez Garcia et al., 2019). As DNA in closed chromatin regions is often highly  
48 methylated, another emerging feature of pioneer TFs is their capability to bind DNA in a  
49 methylation insensitive manner (Zhu et al., 2016; Mayran and Drouin, 2018). Some pioneer  
50 TFs are even able to directly recruit DNA demethylases at methylated sites, thereby facilitating  
51 the remodeling of closed regions (Iwafuchi-Doi, 2018).

52 Pioneer TFs are often master regulators controlling developmental transitions, with the  
53 mammalian pluripotency factors OCT4, SOX2, and KLF4 representing some of the most well-  
54 studied (Soufi et al., 2015). These factors bind to closed chromatin regions and induce their  
55 opening or remodeling, so that genes they contain can be activated by the pioneer TFs  
56 themselves or by other TFs called settlers (Sherwood et al., 2014; Slattery et al., 2014). The  
57 modification of the chromatin landscape by pioneer TF can be accomplished either directly by  
58 triggering DNA detachment from nucleosomes (Dodonova et al., 2020; Michael et al., 2020),  
59 or indirectly by the recruitment of ATP-dependent cellular machineries, such as chromatin  
60 remodelers that remove or modify adjacent nucleosomes in order to prime downstream  
61 regulatory events (Hu et al., 2011; King and Klose, 2017). Such capacity to modify DNA  
62 accessibility is another defining feature of pioneer TFs (Iwafuchi-Doi and Zaret, 2014).

63 In plants, the only TF reported as pioneer TF so far is LEAFY COTYLEDON1 (LEC1), a seed  
64 specific TF involved in embryonic epigenetic reprogramming (Tao et al., 2017). LEC1 was  
65 shown to promote the initial establishment of an active chromatin state of its target gene in  
66 silenced chromatin and activate its expression *de novo*. Pioneer TF activity was also suggested  
67 for two types of factors controlling flower development, the MADS homeotic TFs (Pajoro et  
68 al., 2014; Denay et al., 2017) and the master floral regulator, LEAFY (LFY). The MADS TFs,

69 including APETALA1 (AP1) and SEPALLATA3, were shown to be able to access closed  
70 chromatin regions to specify floral organs, and were thus postulated to act as pioneer TFs  
71 (Pajoro et al., 2014). However, mammalian MADS TFs do not seem to act as pioneer factors  
72 and thus the identification of AP1 and SEP3 as potential pioneers remains speculative  
73 (Sherwood et al., 2014). In contrast to the MADS TFs, one previous study suggest that LFY  
74 may have pioneer activity (Sayou et al., 2016). LFY is a master regulator specifying the floral  
75 identity of meristems. It directly induces the floral homeotic genes *API*, *APETALA3 (AP3)* and  
76 *AGAMOUS (AG)* (Parcy et al., 1998; Wagner, 1999; Lohmann et al., 2001; Chae et al., 2008;  
77 Yamaguchi et al., 2013; Chahtane et al., 2013). *AG* and *AP3* are known to be under the  
78 repression of Polycomb repressive complexes in seedlings (Goodrich et al., 1997; Turck et al.,  
79 2007; Calonje et al., 2008). This suggests that their activation during flower development  
80 requires modifications of their chromatin landscape and that the direct binding of LFY to their  
81 regulatory regions might trigger. Consistent with this, LFY was suggested to be able to access  
82 closed chromatin regions *in vivo* (Sayou et al., 2016). Moreover, LFY's role is not confined to  
83 conferring a flower fate to meristems. It can also contribute to meristem emergence (Moyroud  
84 et al., 2010; Chahtane et al., 2013; Yamaguchi et al., 2013), and together with its co-regulators  
85 such as the homeodomain TF WUSCHEL or the F-Box protein UNUSUAL FLORAL  
86 ORGANS, it can even induce meristem formation from root or leaf tissue, respectively (Levin  
87 and Meyerowitz, 1995; Gallois et al., 2004; Risseuw et al., 2013). Taken together, these data  
88 indicate that LFY has the full capability of reprogramming cell fate, a property often requiring  
89 pioneer activity. However, whether LFY is truly able to directly bind closed chromatin regions  
90 and change their status has yet to be demonstrated.

91 Here, we address the pioneer activity of LFY *in vitro* and *in vivo*. Firstly, we determined  
92 whether LFY binding was sensitive to DNA methylation. For this, we combined *in vitro* LFY  
93 genome-wide binding data using methylated and unmethylated genomic DNA and structural  
94 analysis. These experiments demonstrated that LFY binding is only mildly sensitive to DNA  
95 methylation. In order to test whether LFY binding was compatible with the presence of  
96 nucleosomes, we compared LFY binding data from chromatin immunoprecipitation sequencing  
97 (ChIP-seq) and chromatin accessibility data. Based on these comparisons, we found that LFY  
98 could access a number of closed chromatin regions and that LFY colocalizes with nucleosomes  
99 in some regions *in vivo*. Using electrophoretic mobility shift assays (EMSA), we further showed  
100 that LFY was able to directly bind nucleosomes *in vitro*. Finally, chromatin accessibility assays  
101 demonstrated that LFY constitutive expression was sufficient to increase chromatin

102 accessibility in genomic regions including its known target genes *API* and *AG*. Taken together,  
103 these data establish that LFY is able to act as a pioneer TF in the regulation of important target  
104 genes critical for the establishment of floral fate.

## 105 **Results**

### 106 **LFY is weakly sensitive to DNA methylation**

107 In closed chromatin regions, DNA is packed within nucleosomes (McGinty and Tan, 2015) and  
108 its level of methylation is often higher than in open chromatin (Chodavarapu et al., 2010). Both  
109 the presence of nucleosome and DNA methylation usually reduce TFs access and their binding  
110 to target DNA (Yin et al., 2017; Klemm et al., 2019). In order to assess the effect of methylation  
111 on LFY binding to DNA, we applied DNA Affinity Purification sequencing (DAP-seq)  
112 (O'Malley et al., 2016). Similar to ChIP-seq, this technique allows the identification of the  
113 genomic regions bound by a TF but using naked DNA and a recombinant TF. We used  
114 Arabidopsis genomic DNA extracted from seedlings that was either PCR amplified (ampDAP,  
115 DNA cleared of methylation) or not amplified (DAP, DNA retaining methylation). Both  
116 experiments were performed in triplicates with high reproducibility (Supplemental Figure 1;  
117 Supplemental Table 1). As controls, we used two TFs described as methylation sensitive based  
118 on available ampDAP and DAP datasets (O'Malley et al., 2016) (Supplemental Figure 2). For  
119 each genomic region bound by a given TF, we plotted the DAP/ampDAP signal ratio as a  
120 function of the methylation density in the whole bound region (based on Arabidopsis seedling  
121 methylation maps (Zhang et al., 2016)). If the DNA binding of a TF is inhibited by methylation,  
122 we expect the DAP/ampDAP ratio to decrease when the methylation level increases. LFY DNA  
123 binding was much less affected by increasing methylation density than the two methylation  
124 sensitive TFs, (Figure 1A-C). To analyze more precisely the effect of methylation, we tested  
125 the correlation between the number of methylated cytosines within the best TF binding (TFBS)  
126 site, identified using position weight matrices in each bound region and the DAP/ampDAP ratio  
127 of bound regions. Whereas an increased number of methylated cytosines in TFBS strongly  
128 decreased the binding for the two methylation sensitive TFs in DAP relative to ampDAP, LFY  
129 binding was only mildly affected (Figure 1D-F). Finally, we designed a specific procedure to  
130 compute the effect of methylation on each individual cytosine possibly present in the best TFBS  
131 (Supplemental Figure 3-5). In the case of LFY, we identified two positions where the binding  
132 is increased by cytosine methylation (positions 4 on the forward DNA strand and 5 on the  
133 reverse), and other positions (2,3,7,8 on the forward strand and 1,3,4,9 on the reverse) where

134 the binding is only mildly inhibited (Figure 1G). In contrast, methylation was inhibitory for the  
 135 two methylation sensitive TFs in most positions where a cytosine can possibly be present  
 136 (Figure 1H-I). Structural analysis of LFY DNA binding domain in complex with DNA (Hamès  
 137 et al., 2008) provided a biochemical explanation of these positive and negative effects  
 138 (Supplemental Figure 6). In particular, the hydrophobic contacts between LFY and DNA are  
 139 likely to be enhanced by the presence of a methyl group in positions 4 and 5 of the LFY binding  
 140 site (LFYBS), consistent with the DAP versus ampDAP analysis (Figure 1G).  
 141

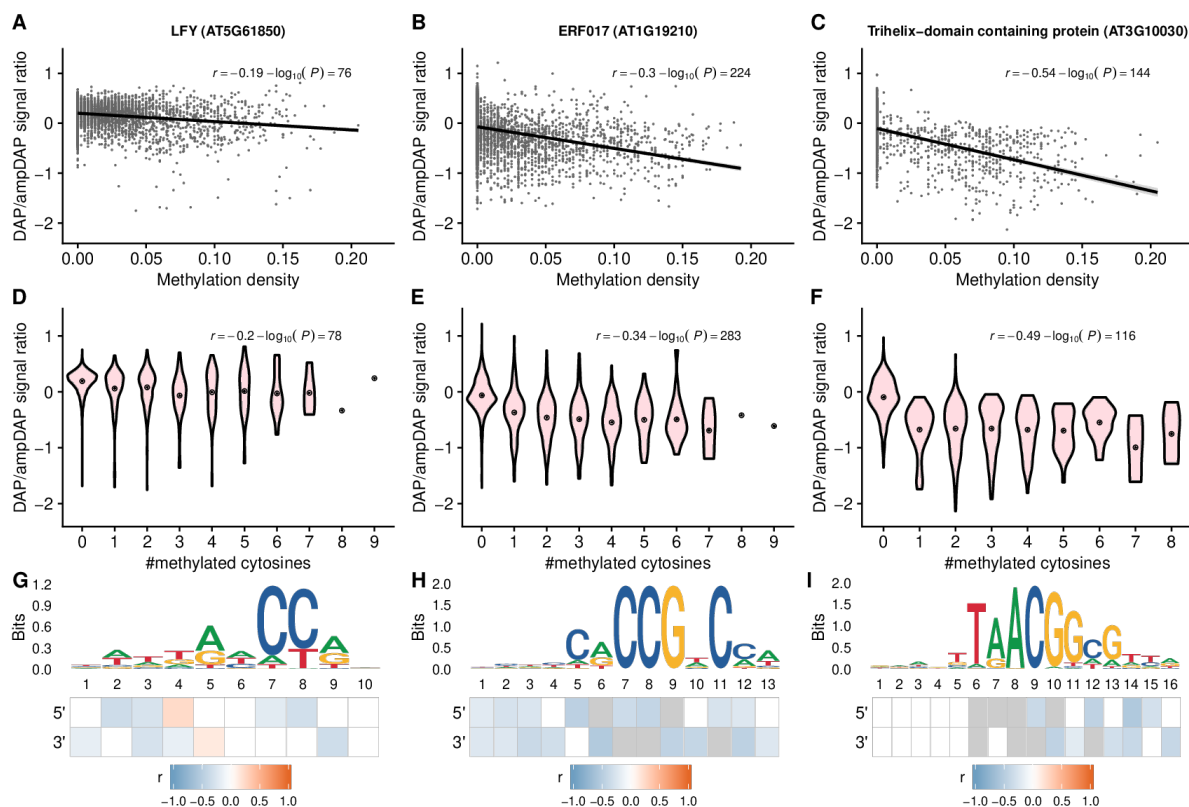

142  
 143 **Figure 1: Cytosine methylation has a mild effect on LFY DNA-binding intensity.**

144 Effect of cytosine methylation on DNA binding for three transcription factors: LFY (left),  
 145 ERF017 (middle) and a trihelix-domain containing protein (right). (A-C) Biplots between the  
 146 DAP/ampDAP signal ratio (peak normalized read coverage in the DAP experiment divided to  
 147 that in the ampDAP experiment) in a log<sub>10</sub> scale and methylation density (proportion of  
 148 cytosines with a probability of methylation greater than 0.5) within transcription factor bound  
 149 regions. The increasing methylation density has weaker effect on LFY than on the two other  
 150 TFs. (D-F) Violin plots of DAP/ampDAP signal ratio in a log<sub>10</sub> scale as a function of the number  
 151 of methylated cytosines in the best TF binding site (TFBS) of each bound region. LFY binding  
 152 is barely affected by the increased number of methylated cytosines. (G-I) Binding site sequence

153 motif for each TF and the methylation effect on each individual position. For LFY, a single half  
154 of the symmetric motif is shown. Heatmaps show the Pearson's correlation coefficient ( $r$ )  
155 between the DAP/ampDAP signal ratio in a  $\log_{10}$  scale and the probability of methylation at  
156 each position of the best TFBSs. Blank positions have a high false discovery rate ( $> 5\%$ ) and  
157 grey indicates positions with less than ten cytosines in the dataset. Correlation are tested on  
158 both sides of a symmetric motif (G) or on both strands for non-symmetric motifs (H-I).

### 159 **LFY binds to a subset of the closed chromatin regions**

160 Next, we analyzed how *in vivo* factors (including the chromatin state) affect LFY DNA binding.  
161 For this, we compared LFY binding *in vitro* and *in vivo* by plotting the coverage of LFY DAP-  
162 seq peaks versus that of LFY ChIP-seq peaks. LFY ChIP-seq was obtained from *35S::LFY*  
163 seedlings or floral meristems (Sayou et al., 2016; Goslin et al., 2017). This analysis identified  
164 genome regions well bound in both experiments (Figure 2A; Supplemental Figure 7A; colored  
165 in light purple to red). However, it also highlighted the existence of regions much better bound  
166 *in vivo* (ChIP-specific regions colored in deep purple) or *in vitro* (DAP-specific regions colored  
167 in orange). The existence of ChIP-specific regions indicated that LFY DNA binding might  
168 increase due to interactions with *in vivo* factors. The presence of DAP-specific regions indicated  
169 that the *in vivo* context inhibits LFY from binding to some genomic regions despite high affinity  
170 LFY binding sites are observed in those regions in DAP-seq.

171 To understand whether chromatin conformation could play a role in this inhibition, we analyzed  
172 the chromatin state of each region using DNaseI-seq data obtained in two-week-old seedlings  
173 (Zhang et al., 2012), a high DNaseI-seq signal being indicative of an open region (Figure 2B;  
174 Supplemental Figure 7B). We found that many of the DAP-specific regions have a low DNaseI  
175 signal, typical of closed chromatin regions. This suggests that closed chromatin regions inhibit  
176 LFY binding. However, as previously observed (Sayou et al., 2016), a number of regions are  
177 bound in ChIP-seq despite low DNaseI signal (right panels on Figure 2B and Supplemental  
178 Figure 7B). Overall, this analysis suggests that while the closed chromatin context is generally  
179 inhibitory for LFY binding, some closed chromatin regions can still be bound. To analyze what  
180 type of closed regions are most likely to be bound, we analyzed the upper and lower deciles of  
181 regions ranked based on their ChIP-seq signal, the upper decile contains regions well bound in  
182 ChIP whereas the lower has regions poorly bound in ChIP (but bound in DAP). The distribution  
183 of nine chromatin states (as defined in the literature (Sequeira-Mendes et al., 2014)) changes  
184 drastically between the two deciles (Figure 2C; Supplemental Figure 7C). Chromatin states 7,  
185 8, and 9 (that is the most compacted and includes heterochromatin) are unlikely to be bound



186 whereas states 1-5, which represent closed regions but closer to gene units or targets of  
 187 Polycomb repression (state 5) are more frequently found in LFY bound regions, showing that  
 188 closed regions are not all equivalently contacted by LFY depending on their functional  
 189 category.

190 As closed chromatin regions are often occupied by nucleosomes, and since *in vivo* data suggests  
 191 that LFY might be able to bind some of these regions, we wondered whether LFY binding was  
 192 compatible with the presence of nucleosomes. To test this, we compared the position of LFY  
 193 ChIP-seq peaks with that of nucleosomes (based on MNase-seq data (Zhang et al., 2015)). We  
 194 found that nucleosomes were indeed enriched at the center of LFY ChIP-seq peaks in closed  
 195 regions (Figure 2D; Supplemental Figure 7D), but not in open ones (Figure 2E; Supplemental  
 196 Figure 8E), suggesting that LFY might be able to directly bind nucleosomal DNA *in vivo*. The  
 197 mapping of LFY TFBS in nucleosome-occupied LFY ChIP-seq peaks show a slight enrichment  
 198 at the center of the nucleosome, around the dyad position which is a site commonly bound by  
 199 pioneer TFs (Figure 3A; Supplemental Figure 8) (Zaret, 2020). However, since these genomic  
 200 data are established on mixtures of tissues, they are not sufficient to firmly establish that LFY  
 201 is indeed able to bind nucleosomal DNA.

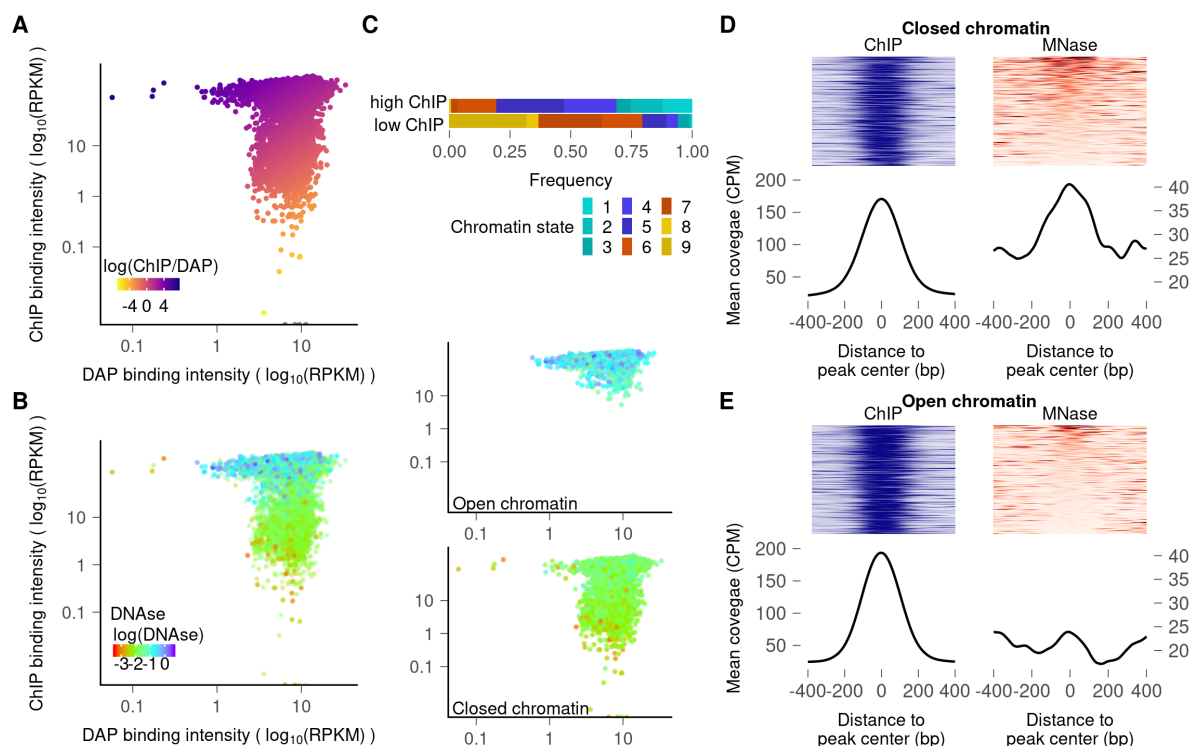

202

203 **Figure 2: LFY is able to bind nucleosomes in closed chromatin regions.**

204 (A) Plots comparing the LFY binding intensities in ChIP-seq vs DAP-seq experiments. Heat  
 205 map is based on the ChIP-seq/DAP-seq intensity ratio. (B) Overlay of DNaseI signal (heat map)



206 on LFY bound regions, with DAP-seq (X-axis) and ChIP-seq (Y-axis) peak coverages. The two  
207 panels on the right show the same regions split into open (upper panel) and closed (lower panel)  
208 chromatin states. (C) Distribution of chromatin states 1 to 9 according to (Sequeira-Mendes et  
209 al., 2014) for the first and last decile of LFY bound regions based on ChIP-seq signal. (D-E)  
210 MNase signal around ChIP-seq peak centers in closed (D) or open (E) chromatin regions. Upper  
211 panels show ChIP-seq and MNase-seq coverage for each peak ordered based on MNase-seq  
212 signal. Lower panels represent the mean coverage.

### 213 **LFY binds nucleosomal DNA at specific sites *in vitro***

214 Next, we tested whether LFY has the capacity to bind nucleosomal DNA *in vitro*. We first  
215 assembled nucleosomes using the Widom 601 strong nucleosome positioning sequence  
216 (Lowary and Widom, 1998; McGinty and Tan, 2015), in which a LFY binding site (LFYBS)  
217 was inserted at different positions (C1-C7 around the dyad and E1-E7 farther away) (Figure  
218 3B; Supplemental Table 2). Nucleosomes assembled with a LFYBS at position C2 and C7 were  
219 shifted upon addition of LFY, whereas no shift was observed for nucleosomes with a LFYBS  
220 at positions C1, C3-C6, E1-E7 or with no LFYBS, demonstrating that LFY binds nucleosomal  
221 DNA in a sequence specific manner and only with a LFYBS present at specific positions (C2,  
222 located around the dyad, and C7, located one helix turn apart from C2, with the LFYBS exposed  
223 to the outer nucleosome surface (Figure 3B and C; Supplemental Figure 9)). Using the same  
224 methodology, as a negative control, we tested nucleosomal DNA binding of the TF  
225 REGULATOR OF AXILLARY MERISTEMS 1 (RAX1), a direct downstream target of LFY  
226 (Chahtane et al., 2013). We found that RAX1 cannot associate with nucleosomes even when its  
227 binding site is exposed to the outer nucleosome surface and at the dyad (Supplemental Figure  
228 10), suggesting that RAX1 is unlikely a pioneer TF. We also assembled nucleosomes with two  
229 regions of the *API* gene, a known early activated LFY target (Parcy et al., 1998; Wagner, 1999;  
230 Benlloch et al., 2011). These regions were taken from *API* first intron and *API* promoter  
231 (annotated as *API* intron and *API* pro, respectively, in Figure 3D). They are both bound by  
232 LFY *in vivo* (ChIP-seq (Moyroud et al., 2011; Winter et al., 2011; Sayou et al., 2016; Goslin et  
233 al., 2017)) and *in vitro* (DAP-seq in Figure 3D), and with well-defined nucleosome signals from  
234 MNase-seq in both seedlings and flower tissues (Zhang et al., 2015) (Figure 3D). We observed  
235 that LFY was able to bind to these nucleosomes (Figure 3E and Supplemental Figure 11),  
236 showing that LFY nucleosomal DNA binding also occurs within Arabidopsis genomic regions.

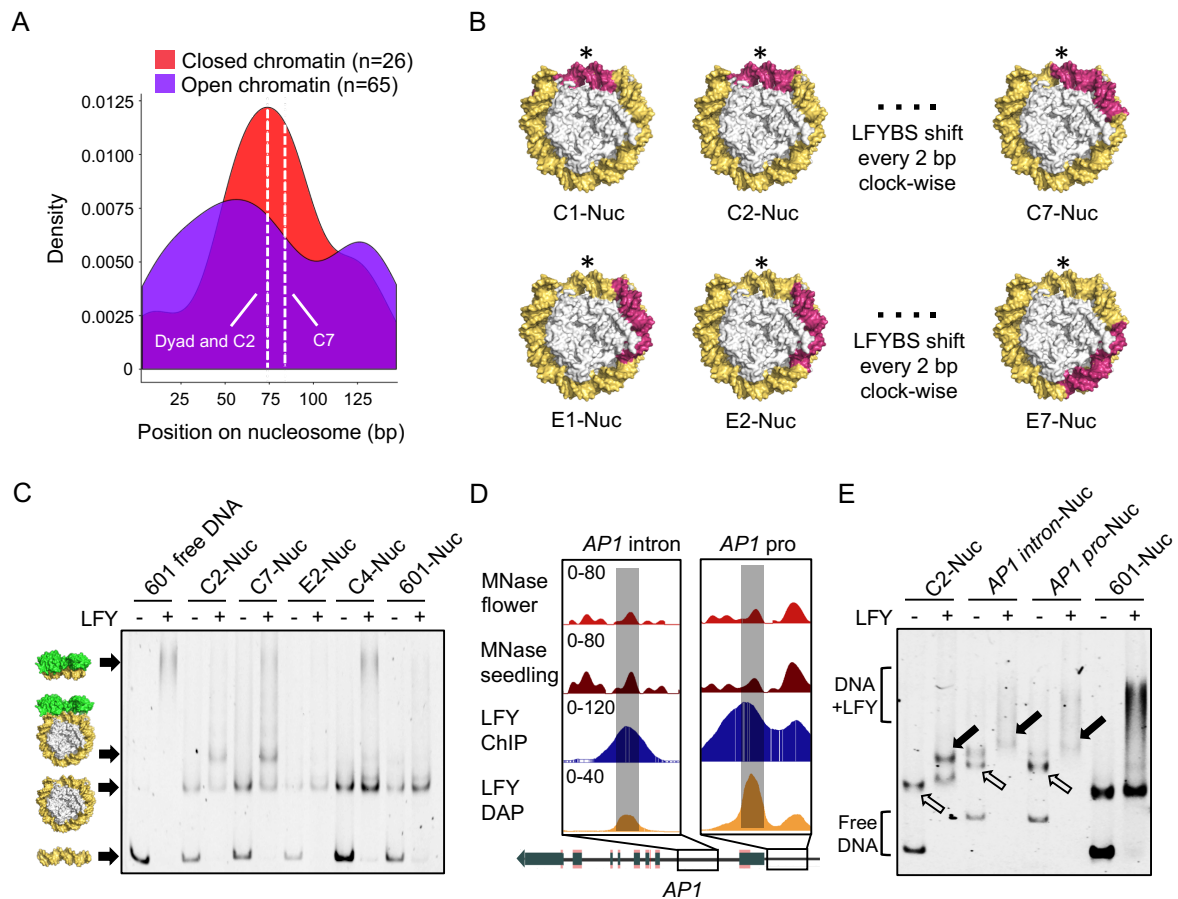

237

238 **Figure 3: LFY binds nucleosomes *in vitro***

239 (A) Density plot of the LFY best binding site along a canonical 147-bp nucleosomal sequence  
 240 in open and closed chromatin contexts for flower tissues. An enrichment for LFY binding sites  
 241 (LFYBS) around the dyad position (the center of the nucleosomal DNA) is observed in closed  
 242 chromatin regions. C2 (at dyad) and C7 positions are indicated. Alternative plots for different  
 243 thresholds for binding sites selection are reported in Supplemental Figure 8. (B) Design of  
 244 Widom 601 sequences (yellow orange) with a LFYBS (warm pink) inserted at different  
 245 positions (central C1-C7 (top) and external E1-E7 (bottom)) on nucleosome (PDB: 3UT9 (Chua  
 246 et al., 2012). \* indicates the dyad. (C) Representative EMSA showing LFY binding to 601  
 247 nucleosomes with a LFYBS at positions C2 (labelled C2-Nuc) and C7, but not at E2, C4 or 601  
 248 nucleosome without a LFYBS (refer to Supplemental Figure 9 for the screening of LFY  
 249 nucleosomal DNA binding at all other positions). Free DNA (C2 in the first 2 lanes, or present  
 250 in the nucleosomal preparations) is shifted at the very top of the gels. 601-Nuc is made with  
 251 wild-type 601 sequence (without a LFYBS): only free DNA is shifted due to non-sequence  
 252 specific interactions with LFY. Cartoon on the side from bottom to top are free DNA,  
 253 nucleosome alone, LFY-nucleosome complex and free DNA-LFY complex. (D) Genomic

254 snapshots of LFY DAP-seq, ChIP-seq (seedlings tissue), and MNase-seq (seedlings and closed  
255 flower buds) at the *API* loci. *API* intron and *API* pro sequences used to assemble nucleosomes  
256 in (E) are highlighted in grey. Both regions are bound in DAP and ChIP, and with well-defined  
257 nucleosome signals, lower in floral tissue than in seedlings. (E) EMSA showing LFY binding  
258 to nucleosomes assembled with *API* intron and *API* pro sequences. AP1-intron-Nuc and AP1-  
259 pro-Nuc are longer than 601 due to the presence of amplification primers. Note some free 601  
260 DNA is shifted despite the absence of LFYBS in the last lane. The hollow and solid arrows  
261 indicate the position of reconstituted nucleosomes and the shifted nucleosomes signals,  
262 respectively.

### 263 **LFY constitutive expression induce changes in nucleosome position**

264 One key characteristic feature of a pioneer TF is to be able to modify the status of closed  
265 chromatin regions (Iwafuchi-Doi and Zaret, 2014). To test whether LFY is able to do so, we  
266 examined whether it could alter nucleosome positions when ectopically expressed in seedlings.  
267 We selected regions that are closed in wild-type seedlings and with a mapped nucleosome  
268 (Zhang et al., 2015) and bound by LFY in ChIP-seq and DAP-seq (Figure 4) (Sayou et al.,  
269 2016). Among these regions, we focused on the three floral regulators, *API* and *AG* (two  
270 established LFY targets), and *ULTRAPETALA 1 (ULT1)*, another floral regulator involved in  
271 *AG* activation (Moreau et al., 2016). Using Formaldehyde-Assisted Isolation of Regulatory  
272 Elements (FAIRE)-qPCR that identifies nucleosome depleted regions, we tested whether  
273 ectopic LFY expression (*35S::LFY*) could alter the local chromatin as compared to two-week-  
274 old Col-0 seedlings where endogenous LFY is not yet highly induced. We found that LFY  
275 ectopic expression induced nucleosome depletion in these regions (Figure 4A). Interestingly,  
276 in the *API* intron, a region strictly inaccessible in Col-0 seedlings according to DNaseI signal,  
277 LFY expression triggers a strong depletion (3-fold, position P1 in Figure 4A). In the *API*  
278 promoter, a region already largely accessible, LFY induced depletion is more moderate (P2,  
279 P3; Figure 4A). As controls, we tested three regions (*Actin2*, *AT2G38220* and *AT4G22285*)  
280 where LFY does not bind *in vivo* and *in vitro* and with poor accessibility in seedlings. We found  
281 that their nucleosome status was not altered by LFY ectopic expression (Figure 4B). Taken  
282 together, our data suggests that LFY ectopic expression in seedling tissues is sufficient to trigger  
283 nucleosome depletion in regulatory regions of some key floral regulators including two LFY  
284 target genes.

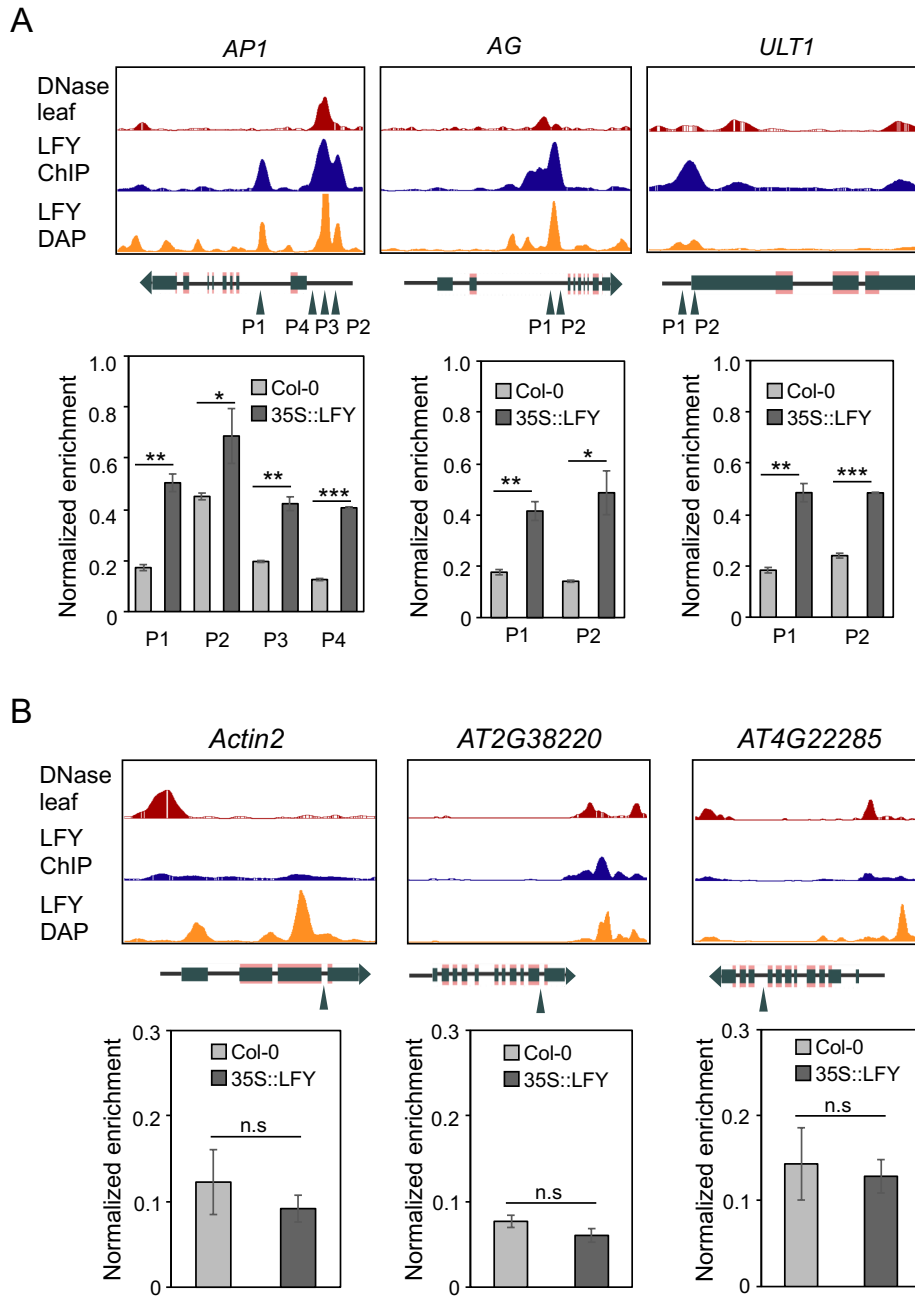

285

286 **Figure 4: LFY constitutive expression increases chromatin accessibility.**

287 (A) (Top) Genomic snapshots of chromatin accessibility (DNaseI-seq from 2-week-old Col-0  
 288 seedlings (Zhang et al., 2012)), LFY binding *in vitro* (DAP-seq using genomic DNA from 2-  
 289 week-old *35::LFY* seedlings), *in vivo* (ChIP-seq of 2-week-old *35::LFY* seedlings (Sayou et al.,  
 290 2016)) at *AP1*, *AG* and *ULT1* loci. The regions tested in FAIRE-qPCR are indicated by triangle  
 291 arrows. (Bottom) FAIRE-qPCR of the indicated regions are performed in 2-week-old seedlings  
 292 of Col-0 (pale gray) and *35S::LFY* (dark gray), respectively. Error bars represent means  $\pm$   
 293 standard deviation. Significance test is performed by one-tailed students' t-test, \* $p < 0.05$ ,  
 294 \*\* $p < 0.01$ , \*\*\* $p < 0.001$ , n.s, not significant. (B) (Top) genome browser snapshots of three

295 genomic regions devoid of LFY binding and poorly accessible in 2-week-old seedlings.  
296 (Bottom) FAIRE-qPCR on the indicated regions. Significance test is performed as per (A). The  
297 FAIRE-qPCR is performed by two biological replicates, with three technical replicates for each.  
298 The enrichment is normalized by input DNA in each experiment.

## 299 **Discussion**

300 LFY is a master regulator of floral development able to induce the expression of floral organ  
301 identity genes that are known to be under repression of Polycomb repressive complex  
302 (Goodrich et al., 1997; Turck et al., 2007; Calonje et al., 2008; Kaufmann et al., 2010). In a  
303 previous study (Sayou et al., 2016), ChIP-seq data suggested LFY could bind to closed  
304 chromatin regions and possibly act as a pioneer factor, although a mechanism was never fully  
305 described. By analyzing seedlings constitutively expressing LFY, it was suggested that LFY  
306 wild type could bind to regions with a closed chromatin status and that this capacity was  
307 strongly impaired upon mutation of the LFY oligomerization sterile alpha motif (SAM) domain  
308 (Sayou et al., 2016). Oligomerization would likely increase the DNA-binding affinity of LFY,  
309 as has been shown for other TFs able to multimerize (Lai et al., 2020). This increase in DNA  
310 binding affinity may be critical for the efficient binding to partially occluded sites in closed  
311 chromatin regions, however an increase in binding affinity alone is likely not sufficient to  
312 enable recognition of a TFBS in a closed region of chromatin. Insensitivity to methylation state  
313 and the presence of nucleosomes are prerequisites to pioneer function, which we investigated  
314 here.

315 Given the high level of DNA methylation found in closed chromatin, it has been hypothesized  
316 that some pioneer TFs would be able to bind DNA independently of its methylation status (Zhu  
317 et al., 2016; Mayran and Drouin, 2018). Indeed, pioneer TFs from animals, such as Pax7  
318 (Mayran et al., 2018, 7), OCT4 (Yin et al., 2017) and KLF4 (Hu et al., 2013; Liu et al., 2014),  
319 are either insensitive or even prefer methylated DNA. The DNA binding of most TFs is  
320 inhibited by DNA methylation because the 5-methyl group of methylcytosine often clashes  
321 with protein residues that are involved in specific base readout (Yin et al., 2017). Some TFs,  
322 however, are not sensitive or even favor methylated DNA because direct hydrophobic  
323 interactions form between the methyl group and the TF, as it is the case for homeodomain TFs  
324 (Yin et al., 2017) or for some basic leucine zipper TFs (Weber et al., 2019). In this study, we  
325 showed that LFY is only mildly sensitive to methylation. We further dissected how methylation  
326 impacts LFY binding for each individual position of a canonical LFY binding site (Figure 1).

327 Consistent with our structural analysis, we showed that the key protein-DNA interactions are  
328 not affected by cytosine methylation (Supplemental Figure 6), and even that, at two positions,  
329 a methyl group might enhance LFY binding. This computational analysis has the potential to  
330 be generalized to all TFs for which DAP and ampDAP data are available. It represents a  
331 powerful complement to methylation-sensitive SELEX (systematic evolution of ligands by  
332 exponential enrichment) analysis which was used to detect the effect of methylation to TF-  
333 DNA binding using randomized DNA sequences (Yin et al., 2017).

334 Next, we examined whether LFY could bind nucleosomal DNA *in vivo*. Overall, for the  
335 majority of regions, a closed chromatin state has inhibitory effect on LFY binding. This is  
336 particularly true for heterochromatin regions likely because their high level of compaction  
337 totally prevents TF access. However, a subset of closed regions present in the vicinity of genes  
338 showed a LFY binding signal in ChIP-seq both in seedlings and floral tissues, consistent with  
339 previous observations (Sayou et al., 2016). The limitation of such prior analysis is the  
340 heterogeneity of the tissue used: it is conceivable that the observed LFY binding signal would  
341 come from the subset of cells where the regions are open. Using *in vitro* reconstituted  
342 nucleosomes, we show here that LFY has the capacity to bind nucleosomal DNA. This property  
343 is consistent with structural data showing that LFY binds a single side of the DNA and with  
344 assays where LFYBS position was either exposed to the outer surface (like C2 or C7) or  
345 partially hidden by histones (C1, C3 to C6). Moreover, we found that *LFY* ectopic expression  
346 was able to increase nucleosome depletion at several target loci. We examined in particular the  
347 *API* gene, a known direct target of LFY (Parcy et al., 1998; Wagner, 1999) that is induced  
348 immediately after LFY during flower development. LFY binds to two *API* regions, its promoter  
349 and its first intron. According to DNaseI signal, *API* promoter is a region already open in  
350 seedlings and with two nucleosomes detected by MNase-seq. This observation likely explains  
351 that *API* promoter can be induced by LFY already in seedlings and independently of flower  
352 formation (Parcy et al., 1998). Here, we observe that LFY ectopic expression is able to induce  
353 a mild nucleosome depletion on *API* promoter (Figure 4A). The effect on *API* intron is more  
354 pronounced. This region is closed in seedlings according to DNaseI signal and opens in the  
355 flower. Consistently, we observed a strong nucleosome depletion following LFY constitutive  
356 expression (Figure 4A). It is thus likely that LFY pioneer property is essential to trigger *API*  
357 activation through the opening of its closed intronic regulatory region.

358 Our *in vitro* experiments using reconstituted nucleosomes and LFYBS in various positions  
359 further supports LFY's ability to bind nucleosomal DNA, near the dyad as observed for a subset



360 of animal pioneer TF (Zaret, 2020). Interestingly, LFY binding appears to be fully compatible  
361 with the presence of histones, suggesting that LFY may require additional factors for histone  
362 displacement. The change in chromatin status following LFY binding might be due to LFY's  
363 capacity to recruit chromatin remodelers such as BRAHMA (BRM) and SPLAYED (SYD)  
364 (Wu et al., 2012). These remodelers have been shown to have a very general role (Archacki et  
365 al., 2016) and specific mutations altering LFY-BRM or LFY-SYD interactions are needed to  
366 fully test this hypothesis.

367 Our chromatin accessibility assay by FAIRE-qPCR suggests that constitutive LFY expression  
368 is sufficient to induce accessibility for a few key floral genes. To fully validate LFY pioneer  
369 activity, it would be essential to test its ability to alter chromatin states in the context of floral  
370 meristem cells, where the role of LFY is the most prominent and ideally using single cell  
371 isolation and next generation sequencing techniques. However, pioneer activity is likely a  
372 spectrum of activity in which TFs that play central roles in developmental transitions, such as  
373 LFY, are able to fulfill a pioneer role under certain chromatin conditions, in the presence of  
374 specific cofactors (Zaret, 2020) and/or for a few distinct loci (Li et al., 2019). Taken together,  
375 our *in vitro* and *in vivo* results demonstrate the essential properties of pioneer TFs- the  
376 competence to bind closed chromatin and the ability to trigger subsequent opening of these  
377 closed regions- are properties of LFY in the context of at least a few key floral regulatory  
378 targets. While this manuscript was in preparation, a preprint also describing LFY as a pioneer  
379 TF was made available on the bioRxiv server (Jin et al., 2020).

## 380 **Materials and methods**

### 381 **DAP-seq and ampDAP-seq**

#### 382 *Plasmid construction*

383 Full-length LFY (AT5G61850.1, 420 residues) coding sequence was PCR amplified and cloned  
384 into pTnT vector (Promega) with an N-terminal 5XMyC tag to generate construct pTnT-5MyC-  
385 LFY.

#### 386 *Construction of input libraries for DAP-seq and ampDAP-seq*

387 The input library of ampDAP-seq was PCR amplified from Col-0 genomic DNA (sheared to  
388 average size of 200-500 bp by sonication) and constructed according to published protocol  
389 (O'Malley et al., 2016; Bartlett et al., 2017; Lai et al., 2020). For input library of DAP-seq, the  
390 genomic DNA that retains native methylation pattern was extracted using phenol-chloroform

391 from 2-weeks-old seedlings of *p35S::LFY* line (pCA26 #15) (Sayou et al., 2016) grown on 0.5x  
392 Murashige and Skoog medium in long-day conditions.

### 393 *DAP-seq and ampDAP-seq*

394 LFY protein was produced using an *in vitro* transcription/translation system, TnT® SP6 High-  
395 Yield Wheat Germ Protein Expression System (Promega L3260), according to the  
396 manufacturer's instructions. In brief, 2 µg input plasmid (pTnT-5MyC-LFY) was used in a 50  
397 µl TnT reaction with 2-hr incubation at 25 °C. DAP-seq was carried out according to published  
398 protocol with minor modifications (O'Malley et al., 2016; Bartlett et al., 2017). Briefly, the 50  
399 µl TnT reaction producing LFY was combined with 50 µl IP buffer (20 mM Tris, pH7.5, 150  
400 mM NaCl, 1mM tris(2-carboxyethyl)phosphine, 0.005% NP-40, and proteinase inhibitor  
401 (Roche)) and mixed with 20 µL anti-MyC magnetic beads (Merck Millipore). Following 1 hr  
402 incubation at 4 °C, the anti-MyC magnetic beads were immobilized and washed three times  
403 with 100 µL IP buffer. While the protein was still bound on anti-c-Myc magnetic beads, 50 ng  
404 DAP-seq or ampDAP-seq input library pre-ligated with Illumina adaptor sequences was added.  
405 The DNA binding reaction was incubated at 4 °C on a rotor for 90 mins, and then washed 6  
406 times using 100 µL IP buffer. The bound DNA was heated to 98°C for 10 min and eluted in 30  
407 µl EB buffer (10 mM Tris-Cl, pH 8.5). The eluted DNA fragments were PCR amplified using  
408 Illumina TruSeq primers for 20 cycles, and purified using AMPure XP magnetic beads  
409 (Beckman). The libraries were quantified by qPCR using NEBNext Library Quant Kit for  
410 Illumina following manufacturer's instructions. Individual libraries were pooled with equal  
411 molarity, and sequenced on Illumina HiSeq (Genewiz) with specification of paired-end  
412 sequencing of 150 cycles. Each library obtained around 10 to 20 million raw reads. Both DAP-  
413 seq and ampDAP-seq were performed in triplicates.

### 414 **Bioinformatic analyses**

#### 415 *Reads processing and peak calling*

416 DAP-seq and ampDAP-seq read processing and peak calling was performed as previously  
417 described (Lai et al., 2020). Briefly, reads were checked and cleaned using FastQC  
418 (<http://www.bioinformatics.babraham.ac.uk/projects/fastqc/>), and NGmerge (Gaspar, 2018)  
419 and mapped with bowtie2 (Langmead and Salzberg, 2012) onto the TAIR10 version of the *A.*  
420 *thaliana* genome ([www.arabidopsis.org](http://www.arabidopsis.org)), devoid of the mitochondrial and the chloroplast  
421 genomes. The duplicated reads were removed using the samtools rmdup program (Li et al.,  
422 2009). The resulting alignment files for each sample were input to MACS2 (Zhang et al., 2008)  
423 to call peaks using the input DNA as control. Consensus peaks between replicates (when

424 available) were defined using MSPC (Jalili et al., 2015) ( $P$ -value cutoff =  $10^{-4}$ ) for each  
425 experiment (DAP-seq, amplified DAP-seq and ChIP-seq from (Goslin et al., 2017)). Each  
426 consensus peak was scanned for possible subpeaks, split into several peaks if needed and the  
427 peak widths were then normalized to  $\pm 200$  bp around the peak maximum. For all the resulting  
428 consensus peaks, a normalized coverage was computed as the mean of the normalized read  
429 coverage for each replicate (when replicates were available). Because the DAP-seq and  
430 ampDAP-seq experiment had different signal-to noise ratio (Supplemental Table 1) we used  
431 the total number of reads in consensus peaks for normalization. This normalized coverage  
432 (averaged across replica) defines the binding intensity of a TF at a bound region. The ratio of  
433 the binding intensity between DAP and ampDAP defines the DAP/ampDAP signal ratio.

#### 434 *Measuring the effect of methylation on TF binding*

435 To measure the effect of cytosine methylation on the TF binding affinity, we tested the  
436 correlation between the DAP/ampDAP signal ratio and the methylation levels at 1) the whole  
437 bound regions, 2) at the TF best binding site (TFBS) in the bound region and 3) at each position  
438 of the TFBS. This approach markedly differs from previous analyses (O'Malley) where the  
439 change in binding affinity averaged across all binding sites was contrasted at methylated versus  
440 non-methylated regions in DAP and ampDAP experiments separately. By using the  
441 DAP/ampDAP signal ratio as a function of methylation levels at a same locus, our approach  
442 account for the variability across binding sites and better controls for differences in signal-to-  
443 noise ratio between ampDAP and DAP experiments. TFBSs were searched in bound regions  
444 using a position weight matrix (PWM) constructed for each TFs using MEME (Machanick and  
445 Bailey, 2011). The probability of cytosines methylation was taken from (Zhang et al., 2016).  
446 Methylation density (the number of methylated cytosines in a bound region) was defined as the  
447 number of cytosines with a probability of methylation greater than 50%. Association between  
448 the relative binding intensity and methylation levels was assessed using Pearson's correlation  
449 tests from R package. The effect of methylation on LFY binding was compared to that of two  
450 others TFs (AT1G19210 and AT3G10030) for which DAP-seq and ampDAP-seq samples were  
451 available from (O'Malley et al., 2016).

#### 452 *ChIP-seq versus DAP-seq binding affinity comparison*

453 The ChIP-seq datasets used were obtained from (Sayou et al., 2016) (1,954 peaks, two-week-  
454 old seedlings 35S:LFY tissue) , or re-computed (see above) from (Goslin et al., 2017) (884  
455 peaks, inflorescence tissue of 35S:LFY-GR *apl cal*). Only the first 3,000 DAP-seq bound  
456 regions with lowest p-value were considered. Regions bound either in DAP-seq or in ChIP-seq  
457 were merged in a single bed file. When peaks overlapped for more than 80% of their respective

458 length, they were considered as “common” and resized to create a common peak. Coverages of  
459 pooled bound regions were retrieved for both datasets.

#### 460 *DNA accessibility*

461 Closed and open chromatin regions were defined according to leaf DNaseI-seq dataset from  
462 (Zhang et al., 2012). DNaseI-seq coverage was computed on the DAP and ChIP pooled peaks  
463 and a peak was classified as open or closed following DHs regions from Zhang et al.

#### 464 *Chromatin state*

465 9 chromatin states was taken from (Sequeira-Mendes et al., 2014). Those chromatin states were  
466 then crossed with our pooled peaks from ChIP-seq and DAP-seq and separated in deciles along  
467 the ChIP-seq to DAP-seq coverage fold ratio (CFR).

#### 468 *Nucleosomes*

469 MNase-seq defined genomic positions of nucleosomes in leaf were retrieved from (Zhang et  
470 al., 2015). Custom python scripts were used to compute MNase-seq coverage for DNase-  
471 defined closed and open bound regions. Peaks were then extended to 800 bp, around the  
472 maximum, and sorted on their center (+/-100 bp around the center).

#### 473 *Position of LFYBS on nucleosomes*

474 LFY ChIP-seq bound regions were considered to be in an open chromatin state if they overlap  
475 by more than 50% with a DNase peak in flower tissues, else they were considered to be in  
476 closed chromatin. MNase data from flower tissues was crossed (using bedtools intersect -f 0.8  
477 (Quinlan and Hall, 2010)) with ChIP-seq peaks to retain nucleosomes that are 80% within a  
478 LFY bound region. The resulting nucleosome sequences, plus half of a LFYBS (i.e. 9bp) at  
479 both sides, were screened for LFYBS using a custom LFY position weight matrix (Sayou et al.,  
480 2016). We then counted the number of LFYBS, taking the center of the motif as reference,  
481 present along the 147 bp sequence of canonical nucleosome.

#### 482 **Protein structural analysis**

483 The structure coordinates of LFY (accessions of 2vy1 and 2vy2 (Hamès et al., 2008)) are taken  
484 from protein data bank (<https://www.rcsb.org>). The cytosine methylation mutation was done  
485 using “Builder” option from the PyMOL GUI ([www.pymol.org](http://www.pymol.org)), all visualization was prepared  
486 using PyMOL.

#### 487 **Protein purification**

488 The protein AtLFYΔ40 was produced in *E. coli* Rosetta2 (DE3) strain (Novagen). Cells were  
489 grown in Luria-Bertani medium supplemented with Kanamycin (50 µg/ml) and  
490 Chloramphenicol (34 µg/ml) at 37 °C under agitation up to an optical density of 600 nm of 0.6.

491 Betaine (2 mM) was added and cultures were shifted to 18 °C for 1 h before addition of 0.4 mM  
492 isopropyl  $\beta$ -D-1-thiogalactopyranoside. After overnight growth at 18 °C, cells were pelleted by  
493 centrifugation. Pellets corresponding to 0.5 l culture containing the recombinant protein were  
494 sonicated in 50 ml of lysis buffer (20 mM Tris–HCl pH 8.5, 1 mM TCEP) supplemented by one  
495 protease inhibitor cocktail tablet Complete EDTA-free (Roche) and centrifuged for 30 min at  
496 20,000 g 4°C. The clear supernatant was transferred on a column containing 1 ml Ni-Sepharose  
497 High Performance resin (GE Healthcare), washed two times with lysis buffer containing 20  
498 mM and 40 mM imidazole, respectively, and eluted with lysis buffer containing 300 mM  
499 imidazole. Eluted fractions were immediately diluted three times in buffer without imidazole  
500 and dialysed overnight. Protein concentrations were determined by SDS-PAGE, using a BSA  
501 standard curve run on the same gel.

502 Recombinant histones were produced according to published protocols (Shim et al., 2012). The  
503 coproduction of the *Xenopus laevis* four core histones was done using a pET29a polycistronic  
504 plasmid containing the four core histones. The histoneH2A was tagged with N-terminal  
505 hexahistidine (his6)-tag with a thrombin cleavage site. Histone H4 was tagged with a C-  
506 terminal His6-tag preceded by a thrombin cleavage site. This plasmid was transformed in  
507 BL21(DE3)pLysS bacteria. Cells were grown in Luria-Bertani medium supplemented with  
508 Kanamycin (50  $\mu$ g/ml) and Chloramphenicol (34  $\mu$ g/ml) at 37 °C under agitation up to an  
509 optical density of 600 nm of 0.6. were shifted to 18 °C for 1 h before addition of 0.4 mM  
510 isopropyl  $\beta$ -D-1-thiogalactopyranoside. cells were pelleted by centrifugation. Pellets  
511 containing the recombinant protein were sonicated in 50 ml of lysis buffer (20 mM Tris–HCl  
512 pH 7.5, 2 M NaCl 1 mM TCEP) supplemented by one protease inhibitor cocktail tablet  
513 Complete EDTA-free (Roche) and centrifuged for 30 min at 18,000 g 4°C. The clear  
514 supernatant was transferred on a column containing 3 ml Ni-Sepharose High Performance resin  
515 (GE Healthcare), washed two times with lysis buffer containing 30 mM and 50 mM imidazole,  
516 respectively. Elution was performed with lysis buffer containing 300 mM imidazole. Fraction  
517 were analyzed on 18% SDS-PAGE. Thrombin digestion was carried out by adding purified  
518 thrombin in 25:1 mass ratio and incubating the samples at room temperature for 4 hours. The  
519 digestion was confirmed by SDS-PAGE. Digested histones were then concentrated by  
520 centrifugation using amicon membrane (MW50KDa) at 4°C et 4,000xg during 20 min intervals,  
521 with gentle mixing between each centrifugation. The concentrated sample was then injected  
522 onto a Superdex 200 10/300 column in lysis buffer. The histone octamer peak was eluted at an  
523 elution volume of 12.8 ml. the peaks fractions were pooled and concentrated at a concentration  
524 of 1.84 mg/ml and aliquoted flash-frozen in the presence of 50% glycerol.

525 **Nucleosome reconstruction**

526 *DNA sequences used for nucleosome reconstruction*

527 To test the interaction between AtLFY $\Delta$ 40 and nucleosomes we reconstituted nucleosomes  
528 with the 601 sequences and different 601 sequences containing a LFY binding site at different  
529 positions (C1-C7 and E1-E7, Figure 3B). As a control, we also tested RAX1 nucleosomal DNA  
530 binding using 601 sequence containing a RAX1 binding site (C1-C7, Figure 3B). All cloned in  
531 a pUC57 plasmid (sequences see Supplemental Table 2 and 3). Sequences of an *API* intronic  
532 region and *API* promoter region (Figure 3D) were also cloned in pUC57 and used for  
533 nucleosomal reconstitution (sequences see Supplemental Table 2).

534 All fragments used for nucleosome reconstruction were amplified by PCR using Invitrogen  
535 primer labelled with CY5 fluorophore. The resulting fragment was then checked by 1% agarose  
536 gel and purified with the Monarch® DNA Gel Extraction Kit (New England Biolabs). The  
537 purified fragment was precipitated by ethanol precipitation and resuspended in buffer (25 mM  
538 Tris, pH 7.5, 2 M NaCl and 1mM TCEP) and adjusted at a concentration of 200 ng/ $\mu$ l.

539 *Nucleosome reconstruction*

540 The nucleosomes assembly was performed by salt dilution method (Okuwaki et al., 2005).  
541 Briefly, DNA of interest and recombinant histone octamer were mixed at a molar ratio (DNA /  
542 histones) between 1/1 and 1/1.2 in a solution of 25 mM Tris pH 7.5 2M NaCl 1mM TCEP. This  
543 mix was incubated at 30°C for 20 min. The reaction was serially diluted to 1.5, 1, 0.8, 0.6, 0.5,  
544 0.4, 0.3, and 0.2 M NaCl using buffer 25 mM Tris pH7.5 1mM TCEP with 20 min incubation  
545 at 30°C for each dilution step. The reconstitution was confirmed by native gel analysis.

546 **Electrophoretic Mobility Shift Assay**

547 Nucleosomes of interest were incubated with 500  $\mu$ M AtLFY $\Delta$ 40 in buffer (25 mM Tris pH7.5  
548 200mM NaCl 1mM TCEP 10% glycerol 0.1 mg/ml BSA 0,12 mg/ml herring and salmon sperm  
549 DNA for 1 hour at room temperature. The different complex was separated on 5% non-  
550 denaturing polyacrylamide gels run in 0.5X Tris-borate –EDTA (TBE) buffer. Gels run for one  
551 hour at 4°C at 120 V. Complexes were visualized with Cy5 – exposition filter (ChemiDoc MP  
552 Imager; BIO-RAD).

553 **Formaldehyde-Assisted Isolation of Regulatory Elements (FAIRE)-qPCR**

554 *Site selection for FAIRE-qPCR*

555 To test the effect of LFY binding on nucleosomes, LFY CHIP-seq peaks (Sayou et al., 2016)  
556 with a nucleosome in leaf tissue (overlap  $\geq$  50%) and no nucleosomes in floral tissue were



557 selected (Zhang et al., 2015). Selected peaks were then attributed to nearby genes (peaks within  
558 3 kb upstream and 1 kb downstream; overlap  $\geq$  80%). In those regions, we selected two known  
559 LFY targets, *API* (AT1G69120) and *AG* (AT4G18960), and *ULT1* (AT4G28190), another  
560 floral regulator. We applied a similar method to select three control regions that are not bound  
561 by LFY and are occupied with nucleosomes in leaf and floral tissue (AT3G18780 (*Actin2*),  
562 AT2G38220 and AT4G22285).

### 563 *FAIRE-qPCR*

564 FAIRE assays were performed on two-week-old seedlings of *Arabidopsis thaliana* ecotype  
565 Columbia (Col-0) background and 35S::LFY. Seeds were surface-sterilized by treatment with  
566 bayrochlore, washed, then sown in sterile half-strength MS medium and placed for 2–4 days at  
567 4 °C to obtain homogeneous germination. Plants were grown in square petri dishes in growth  
568 chambers at 20 °C under long-day (16 h of light) conditions. 1g of plant material was then  
569 crosslinked in 1% (v/v) formaldehyde at room temperature for 15 min using vacuum  
570 infiltration. Crosslinking was quenched by adding glycine solution to a final concentration of  
571 0.125M under vacuum infiltration for 5 minutes. The crosslinked plantlets were ground into  
572 powder using liquid nitrogen and nuclei were isolated using Nuclei Isolation Buffer (0,25M  
573 Sucrose, 10mM Tris-HCl pH8, 10mM MgCl<sub>2</sub>, 1% Triton X-100, 5mM  $\beta$ -mercaptoethanol, and  
574 proteases inhibitors) and then resuspended in 1ml of FAIRE Lysis Buffer (0,1% SDS, 50 mm  
575 Tris-HCl pH 8, 10 mm ethylene diamine tetraacetic acid (EDTA) pH 8). The crosslinked DNA  
576 was sheared to an average size of 200 - 300 bp using a Covaris S220 (Peak Power: 175W,  
577 cycles/burst: 200, Duty Factory: 20, 4min). Samples were centrifuged for 15 min and 13,000 x  
578 g at 4 °C and the supernatant was transferred into new tubes. A 100 $\mu$ l aliquot was used as  
579 control DNA and directly treated with 1 $\mu$ l of RNase A+T1 cocktail enzyme mix (Thermo  
580 Fisher Scientific) for 1h at 37°C followed by proteinase K treatment for 4h at 37°C and 6h at  
581 65°C to reverse the crosslinks. The non-de-crosslinked samples were RNase A+T1 treated as  
582 for control DNA and a phenol:chloroform:isoamyl alcohol (25:24:1) extraction was performed  
583 to purify DNA and control DNA in a final volume of 100  $\mu$ L TE buffer (10 mM Tris pH 8,  
584 1mM EDTA). The non-de-crosslinked free DNA samples were then incubated overnight at 65  
585 °C to remove inter-DNA crosslinks. DNA was quantified using Qubit ds DNA HS kit (Thermo  
586 Fisher Scientific) and the ratio between nucleosome-free DNA versus total DNA was  
587 determined by qPCR analysis using 20ng of template DNA for each reaction.

### 588 **Accession Numbers**

589 LFY DAP-seq sequencing data from this article can be found in the NCBI GEO data libraries  
590 under accession numbers GSE160013 (token afwnayckrrajfev for reviewers).

## 591 **Acknowledgements**

592 We thank K. Kaufmann for discussions. This project was supported by the ANR-DFG project  
593 Flopinet (ANR-16-CE92-0023-01) to CZ and FP, the GRAL LabEX (ANR-10-LABX-49-01)  
594 with the frame of the CBH-EUR-GS (ANR-17-EURE-0003) to CZ, FP and AS.

## 595 **Authors contributions**

596 FP, CZ, RD designed and supervised the project, RBM, JL, AS performed bioinformatics  
597 analyses, LG, GV, JLM, HD, ET and EBH performed biochemical analyses, XL performed  
598 DAP-seq, YW performed FAIRE supervised by MB and DL, FP, CZ and XL wrote the paper  
599 with the help of all authors.

## 600 **References**

- 601 Archacki, R., Yatusевич, R., Buszewicz, D., Krzyczmonik, K., Patryn, J., Iwanicka-  
602 Nowicka, R., Biecek, P., Wilczynski, B., Koblowska, M., Jerzmanowski, A., et al.  
603 (2017). Arabidopsis SWI/SNF chromatin remodeling complex binds both promoters  
604 and terminators to regulate gene expression. *Nuc. Acids Res.* 45(6):3116-3129.  
605
- 606 Bartlett, A., O'Malley, R. C., Huang, S. C., Galli, M., Nery, J. R., Gallavotti, A., and Ecker, J. R.  
607 (2017). Mapping genome-wide transcription-factor binding sites using DAP-seq. *Nat.*  
608 *Protocols* 12:1659–1672.
- 609 Benlloch, R., Kim, M. C., Sayou, C., Thévenon, E., Parcy, F., and Nilsson, O. (2011). Integrating  
610 long-day flowering signals: A LEAFY binding site is essential for proper photoperiodic  
611 activation of APETALA1. *Plant J.* 67:1094–1102.
- 612 Calonje, M., Sanchez, R., Chen, L., and Sung, Z. R. (2008). EMBRYONIC FLOWER1 Participates  
613 in Polycomb Group-Mediated AG Gene Silencing in *Arabidopsis*. *Plant Cell* 20:277–  
614 291.
- 615 Chae, E., Tan, Q. K.-G., Hill, T. A., and Irish, V. F. (2008). An Arabidopsis F-box protein acts as  
616 a transcriptional co-factor to regulate floral development. *Development* 135:1235–  
617 1245.
- 618 Chahtane, H., Vachon, G., Le Masson, M., Thévenon, E., Périgon, S., Mihajlovic, N., Kalinina,  
619 A., Michard, R., Moyroud, E., Monniaux, M., et al. (2013). A variant of LEAFY reveals  
620 its capacity to stimulate meristem development by inducing RAX1. *Plant J.* 74:678–  
621 689.

622 Chodavarapu, R. K., Feng, S., Bernatavichute, Y. V., Chen, P.-Y., Stroud, H., Yu, Y., Hetzel, J. A.,  
623 Kuo, F., Kim, J., Cokus, S. J., et al. (2010). Relationship between nucleosome  
624 positioning and DNA methylation. *Nature* 466:388–392.

625 Chua, E. Y. D., Vasudevan, D., Davey, G. E., Wu, B., and Davey, C. A. (2012). The mechanics  
626 behind DNA sequence-dependent properties of the nucleosome. *Nuc. Acids Res.*  
627 40:6338–6352.

628 Denay, G., Chahtane, H., Tichtinsky, G., and Parcy, F. (2017). A flower is born: an update on  
629 Arabidopsis floral meristem formation. *Cur. Op. Plant Biol.* 35:15–22.

630  
631 Dodonova, S. O., Zhu, F., Dienemann, C., Taipale, J., and Cramer, P. (2020). Nucleosome-  
632 bound SOX2 and SOX11 structures elucidate pioneer factor function. *Nature* . 580,  
633 669-672

634 Fernandez Garcia, M., Moore, C. D., Schulz, K. N., Alberto, O., Donague, G., Harrison, M. M.,  
635 Zhu, H., and Zaret, K. S. (2019). Structural Features of Transcription Factors  
636 Associating with Nucleosome Binding. *Mol. Cell* 75, 5, 921-932.

637 Gallois, J.-L., Nora, F. R., Mizukami, Y., and Sablowski, R. (2004). WUSCHEL induces shoot  
638 stem cell activity and developmental plasticity in the root meristem. *Genes & Dev.*  
639 18:375–380.

640 Gaspar, J. M. (2018). NGmerge: merging paired-end reads via novel empirically-derived  
641 models of sequencing errors. *BMC Bioinformatics* 19:536.

642 Goodrich, J., Puangsomlee, P., Martin, M., Long, D., Meyerowitz, E. M., and Coupland, G.  
643 (1997). A Polycomb-group gene regulates homeotic gene expression in Arabidopsis.  
644 *Nature* 386:44–51.

645 Goslin, K., Zheng, B., Serrano-Mislata, A., Rae, L., Ryan, P. T., Kwaśniewska, K., Thomson, B.,  
646 Ó'Maoiléidigh, D. S., Madueño, F., Wellmer, F., et al. (2017). Transcription Factor  
647 Interplay between LEAFY and APETALA1/CAULIFLOWER during Floral Initiation. *Plant*  
648 *Physiol.* 174:1097–1109.

649 Hamès, C., Ptchelkine, D., Grimm, C., Thevenon, E., Moyroud, E., Gérard, F., Martiel, J.-L.,  
650 Benlloch, R., Parcy, F., and Müller, C. W. (2008). Structural basis for LEAFY floral  
651 switch function and similarity with helix-turn-helix proteins. *EMBO J.* 27:2628–2637.

652 Hu, G., Schones, D. E., Cui, K., Ybarra, R., Northrup, D., Tang, Q., Gattinoni, L., Restifo, N. P.,  
653 Huang, S., and Zhao, K. (2011). Regulation of nucleosome landscape and transcription  
654 factor targeting at tissue-specific enhancers by BRG1. *Genome Res.* 21:1650–1658.

655 Hu, S., Wan, J., Su, Y., Song, Q., Zeng, Y., Nguyen, H. N., Shin, J., Cox, E., Rho, H. S., Woodard,  
656 C., et al. (2013). DNA methylation presents distinct binding sites for human  
657 transcription factors. *eLife* 2:e00726.

658 Iwafuchi-Doi, M. (2018). The mechanistic basis for chromatin regulation by pioneer  
659 transcription factors. *Wiley Interdisciplinary Reviews: Systems Biology and Medicine*  
660 11(1):e1427.

661 Iwafuchi-Doi, M., and Zaret, K. S. (2014). Pioneer transcription factors in cell reprogramming.  
662 *Genes Dev.* 28:989–998.

663 Iwafuchi-Doi, M., and Zaret, K. S. (2016). Cell fate control by pioneer transcription factors.  
664 *Development* 143:1833–1837.

665 Jalili, V., Matteucci, M., Masseroli, M., and Morelli, M. J. (2015). Using combined evidence  
666 from replicates to evaluate ChIP-seq peaks. *Bioinformatics* 31:2761–2769.

667 Jin, R., Klasfeld, S., Garcia, M. F., Xiao, J., Han, S.-K., Konkol, A., Zhu, Y., and Wagner, D.  
668 (2020). LEAFY is a pioneer transcription factor and licenses cell reprogramming to  
669 floral fate. *BioRxiv* Advance Access published March 18, 2020,  
670 doi:10.1101/2020.03.16.994418.

671 Kaufmann, K., Pajoro, A., and Angenent, G. C. (2010). Regulation of transcription in plants:  
672 mechanisms controlling developmental switches. *Nat. Rev. Genet.* 11:830–842.

673 King, H. W., and Klose, R. J. (2017). The pioneer factor OCT4 requires the chromatin  
674 remodeller BRG1 to support gene regulatory element function in mouse embryonic  
675 stem cells. *eLife* 6:1–24.

676 Klemm, S. L., Shipony, Z., and Greenleaf, W. J. (2019). Chromatin accessibility and the  
677 regulatory epigenome. *Nat. Rev. Genet.* 20:207–220.

678 Lai, X., Stigliani, A., Lucas, J., Hugouvieux, V., Parcy, F., and Zubieta, C. (2020). Genome-wide  
679 binding of SEPALLATA3 and AGAMOUS complexes determined by sequential DNA-  
680 affinity purification sequencing. *Nuc. Acids Res.* 48:9637–9648.

681 Langmead, B., and Salzberg, S. L. (2012). Fast gapped-read alignment with Bowtie 2. *Nature*  
682 *Methods* 9:357–359.

683 Levin, J.Z. and Meyerowitz, E. M. (1995). UFO: An Arabidopsis Gene Involved in Both Floral  
684 Meristem and Floral Organ Development. *Plant Cell* 7:529–548.  
685

686 Li, H., Handsaker, B., Wysoker, A., Fennell, T., Ruan, J., Homer, N., Marth, G., Abecasis, G.,  
687 Durbin, R., and 1000 Genome Project Data Processing Subgroup (2009). The  
688 Sequence Alignment/Map format and SAMtools. *Bioinformatics* 25:2078–2079.

689 Li, S., Bo Zheng, E., Zhao, L., and Liu, S. (2019). *Nonreciprocal and Conditional Cooperativity*  
690 *Directs the Pioneer Activity of Pluripotency Transcription Factors.* *Cell Reports* 28, 10:  
691 2689-2703.e4

692 Liu, Y., Olanrewaju, Y. O., Zheng, Y., Hashimoto, H., Blumenthal, R. M., Zhang, X., and Cheng,  
693 X. (2014). Structural basis for Klf4 recognition of methylated DNA. *Nuc. Acids Res.*  
694 42:4859–4867.

- 695 Lohmann, J. U., Hong, R. L., Hobe, M., Busch, M. A., Parcy, F., Simon, R., and Weigel, D.  
696 (2001). A Molecular Link between Stem Cell Regulation and Floral Patterning in  
697 Arabidopsis. *Cell* 105:793–803.
- 698 Lowary, P. T., and Widom, J. (1998). New DNA sequence rules for high affinity binding to  
699 histone octamer and sequence-directed nucleosome positioning. *J. Mol. Biol.*  
700 276:19–42.
- 701 Machanick, P., and Bailey, T. L. (2011). MEME-ChIP: Motif analysis of large DNA datasets.  
702 *Bioinformatics* 27:1696–1697.
- 703 Magnani, L., Eeckhoutte, J., and Lupien, M. (2011). Pioneer factors: Directing transcriptional  
704 regulators within the chromatin environment. *Trends Genet.* 27:465–474.
- 705 Mayran, A., and Drouin, J. (2018). Pioneer transcription factors shape the epigenetic  
706 landscape. *J. Biol. Chem.* 293(36):13795–13804.
- 707 Mayran, A., Khetchoumian, K., Hariri, F., Pastinen, T., Gauthier, Y., Balsalobre, A., and Drouin,  
708 J. (2018). Pioneer factor Pax7 deploys a stable enhancer repertoire for specification  
709 of cell fate. *Nat. Genet.* 50: 259–269.
- 710 McGinty, R. K., and Tan, S. (2015). Nucleosome Structure and Function. *Chem. Rev.*  
711 115:2255–2273.
- 712 Michael, A. K., Grand, R. S., Isbel, L., Cavadini, S., Kozicka, Z., Kempf, G., Bunker, R. D.,  
713 Schenk, A. D., Graff-Meyer, A., Pathare, G. R., et al. (2020). Mechanisms of OCT4-  
714 SOX2 motif readout on nucleosomes. *Science* 368, 6498:1460-1465.
- 715 Moreau, F., Thévenon, E., Blanvillain, R., Lopez-Vidriero, I., Franco-Zorrilla, J. M., Dumas, R.,  
716 Parcy, F., Morel, P., Trehin, C., and Carles, C. C. (2016). The Myb-domain protein  
717 ULTRAPETALA1 INTERACTING FACTOR 1 controls floral meristem activities in  
718 Arabidopsis. *Development* 143:1108–1119.
- 719 Moyroud, E., Kusters, E., Monniaux, M., Koes, R., and Parcy, F. (2010). LEAFY blossoms.  
720 *Trends Plant Sci.* 15:346–352.
- 721 Moyroud, E., Minguet, E. G., Ott, F., Yant, L., Posé, D., Monniaux, M., Blanchet, S., Bastien, et  
722 al. (2011). Prediction of regulatory interactions from genome sequences using a  
723 biophysical model for the Arabidopsis LEAFY transcription factor. *Plant Cell* 23:1293–  
724 1306.
- 725 Okuwaki, M., Kato, K., Shimahara, H., Tate, S., and Nagata, K. (2005). Assembly and  
726 Disassembly of Nucleosome Core Particles Containing Histone Variants by Human  
727 Nucleosome Assembly Protein I. *MCB* 25:10639–10651.
- 728 O’Malley, R. C., Huang, S. shan C., Song, L., Lewsey, M. G., Bartlett, A., Nery, J. R., Galli, M.,  
729 Gallavotti, A., and Ecker, J. R. (2016). Cistrome and Epicistrome Features Shape the  
730 Regulatory DNA Landscape. *Cell* 166:1598.

- 731 Pajoro, A., Madrigal, P., Muiño, J. M., Matus, J. T., Jin, J., Mecchia, M. A., Debernardi, J. M.,  
732 Palatnik, J. F., Balazadeh, S., Arif, M., et al. (2014). Dynamics of chromatin  
733 accessibility and gene regulation by MADS-domain transcription factors in flower  
734 development. *Genome Biol.* 15:R41.
- 735 Parcy, F., Nilsson, O., Busch, M. A., Lee, I., and Weigel, D. (1998). A genetic framework for  
736 floral patterning. *Nature* 395:561–566.
- 737 Quinlan, A. R., and Hall, I. M. (2010). BEDTools: a flexible suite of utilities for comparing  
738 genomic features. *Bioinformatics* 26:841–842.
- 739 Risseuw, E., Venglat, P., Xiang, D., Komendant, K., Daskalchuk, T., Babic, V., Crosby, W., and  
740 Datla, R. (2013). An activated form of UFO alters leaf development and produces  
741 ectopic floral and inflorescence meristems. *PLoS ONE* 8.
- 742 Sayou, C., Nanao, M. H., Jamin, M., Pose, D., Thevenon, E., Gregoire, L., Tichtinsky, G., Denay,  
743 G., Ott, F., Llobet, M. P., et al. (2016). A SAM oligomerization domain shapes the  
744 genomic binding landscape of the LEAFY transcription factor. *Nat. Commun.* 7:11222.
- 745 Sequeira-Mendes, J., Araguez, I., Peiro, R., Mendez-Giraldez, R., Zhang, X., Jacobsen, S. E.,  
746 Bastolla, U., and Gutierrez, C. (2014). The Functional Topography of the Arabidopsis  
747 Genome Is Organized in a Reduced Number of Linear Motifs of Chromatin States.  
748 *Plant Cell* 26:2351–2366.
- 749 Sherwood, R. I., Hashimoto, T., O’Donnell, C. W., Lewis, S., Barkal, A. A., Van Hoff, J. P.,  
750 Karun, V., Jaakkola, T., and Gifford, D. K. (2014). Discovery of directional and  
751 nondirectional pioneer transcription factors by modeling DNase profile magnitude  
752 and shape. *Nat. Biotech.* 32:171–178.
- 753 Shim, Y., Duan, M.-R., Chen, X., Smerdon, M. J., and Min, J.-H. (2012). Polycistronic  
754 coexpression and nondenaturing purification of histone octamers. *Ana. Biochem.*  
755 427:190–192.
- 756 Slattery, M., Zhou, T., Yang, L., Dantas Machado, A. C., Gordân, R., and Rohs, R. (2014).  
757 Absence of a simple code: How transcription factors read the genome. *Trends*  
758 *Biochem. Sci.* 39:381–399.
- 759 Soufi, A., Garcia, M. F., Jaroszewicz, A., Osman, N., Pellegrini, M., and Zaret, K. S. (2015).  
760 Pioneer transcription factors target partial DNA motifs on nucleosomes to initiate  
761 reprogramming. *Cell* 161:555–568.
- 762 Tao, Z., Shen, L., Gu, X., Wang, Y., Yu, H., and He, Y. (2017). Embryonic epigenetic  
763 reprogramming by a pioneer transcription factor in plants. *Nature* 551:124–128.
- 764 Turck, F., Roudier, F., Farrona, Sara., Martin-Magniette, M.-L., Guillaume, E., Buisine, N.,  
765 Gagnot, S., Martienssen, R. A., Coupland, G., and Colot, V. (2007). Arabidopsis  
766 TFL2/LHP1 Specifically Associates with Genes Marked by Trimethylation of Histone  
767 H3 Lysine 27. *PLoS Genetics* 3(6):e86.



- 768 Wagner, D. (1999). Transcriptional Activation of APETALA1 by LEAFY. *Science* 285:582–584.
- 769 Weber, E., Buzovetsky, O., Heston, L., Yu, K.-P., Knecht, K. M., El-Guindy, A., Miller, G., and  
770 Xiong, Y. (2019). A Noncanonical Basic Motif of Epstein-Barr Virus ZEBRA Protein  
771 Facilitates Recognition of Methylated DNA, High-Affinity DNA Binding, and Lytic  
772 Activation. *J Virol* 93:e00724-19.
- 773 Winter, C. M., Austin, R. S., Blanvillain-Baufumé, S., Reback, M. A., Monniaux, M., Wu, M. F.,  
774 Sang, Y., Yamaguchi, A., Yamaguchi, N., Parker, J. E., et al. (2011). LEAFY Target Genes  
775 Reveal Floral Regulatory Logic, cis Motifs, and a Link to Biotic Stimulus Response.  
776 *Dev. Cell* 20:430–443.
- 777 Wu, M., Sang, Y., Bezhani, S., Yamaguchi, N., Han, S., Li, Z., Su, Y., Slewinski, T. L., and  
778 Wagner, D. (2012). SWI2/SNF2 chromatin remodeling ATPases overcome polycomb  
779 repression and control floral organ identity with the LEAFY and SEPALLATA3  
780 transcription factors. *Proc. Nat. Acad. Sci. U S A* 109:3576–3581.
- 781 Yamaguchi, N., Wu, M. F., Winter, C. M., Berns, M. C., Nole-Wilson, S., Yamaguchi, A.,  
782 Coupland, G., Krizek, B. A., and Wagner, D. (2013). A Molecular Framework for Auxin-  
783 Mediated Initiation of Flower Primordia. *Dev. Cell* 24:271–282.
- 784 Yin, Y., Morgunova, E., Jolma, A., Kaasinen, E., Sahu, B., Khund-Sayeed, S., Das, P. K., Kivioja,  
785 T., Dave, K., Zhong, F., et al. (2017). Impact of cytosine methylation on DNA binding  
786 specificities of human transcription factors. *Science* 356:eaaj2239.
- 787 Zaret, K. S. (2020). Pioneer Transcription Factors Initiating Gene Network Changes. *Annu.*  
788 *Rev. Genet.* 54:annurev-genet-030220-015007.
- 789 Zhang, Y., Liu, T., Meyer, C. A., Eeckhoute, J., Johnson, D. S., Bernstein, B. E., Nussbaum, C.,  
790 Myers, R. M., Brown, M., Li, W., et al. (2008). Model-based Analysis of ChIP-Seq  
791 (MACS). *Genome Biol.* 9:R137.
- 792 Zhang, W., Zhang, T., Wu, Y., and Jiang, J. (2012). Genome-Wide Identification of Regulatory  
793 DNA Elements and Protein-Binding Footprints Using Signatures of Open Chromatin in  
794 Arabidopsis. *Plant Cell* 24:2719–2731.
- 795 Zhang, T., Zhang, W., and Jiang, J. (2015). Genome-Wide Nucleosome Occupancy and  
796 Positioning and Their Impact on Gene Expression and Evolution in Plants. *Plant*  
797 *Physiol.* 168:1406–1416.
- 798 Zhang, Q., Wang, D., Lang, Z., He, L., Yang, L., Zeng, L., Li, Y., Zhao, C., Huang, H., Zhang, H., et  
799 al. (2016). Methylation interactions in Arabidopsis hybrids require RNA-directed DNA  
800 methylation and are influenced by genetic variation. *Proc. Natl. Acad. Sci. USA*  
801 113:E4248–E4256.
- 802 Zhu, H., Wang, G., and Qian, J. (2016). Transcription factors as readers and effectors of DNA  
803 methylation. *Nat. Rev. Genet.* 17:551–565.
- 804



806

807

808

## Supplementary information

809

810

### The LEAFY floral regulator displays pioneer transcription factor properties

811

812 Xuelei Lai<sup>1,\*</sup>, Romain Blanc-Mathieu<sup>1,\*</sup>, Loïc GrandVuillemin<sup>1,^</sup>, Ying Huang<sup>2,^</sup>, Arnaud

813 Stigliani<sup>1,3</sup>, Jérémy Lucas<sup>1</sup>, Emmanuel Thévenon<sup>1</sup>, Jeanne Loue-Manifel<sup>1,4</sup>, Hussein Daher<sup>1,5</sup>,

814 Eugenia Brun-Hernandez<sup>1</sup>, Gilles Vachon<sup>1</sup>, David Latrassé<sup>2</sup>, Moussa Benhamed<sup>2</sup>, Renaud

815 Dumas<sup>1</sup>, Chloe Zubieta<sup>1</sup> and Francois Parcy<sup>1</sup>

816

817

818 This file contains:

819 11 supplementary figures

820 3 supplementary tables.

821

822 The first 6 figures are related to Figure 1, Figure S7 relates to Figure 2, Figure S8 to Figure 3,

823 and Figures S9-S11 to Figure 4

824

825

826

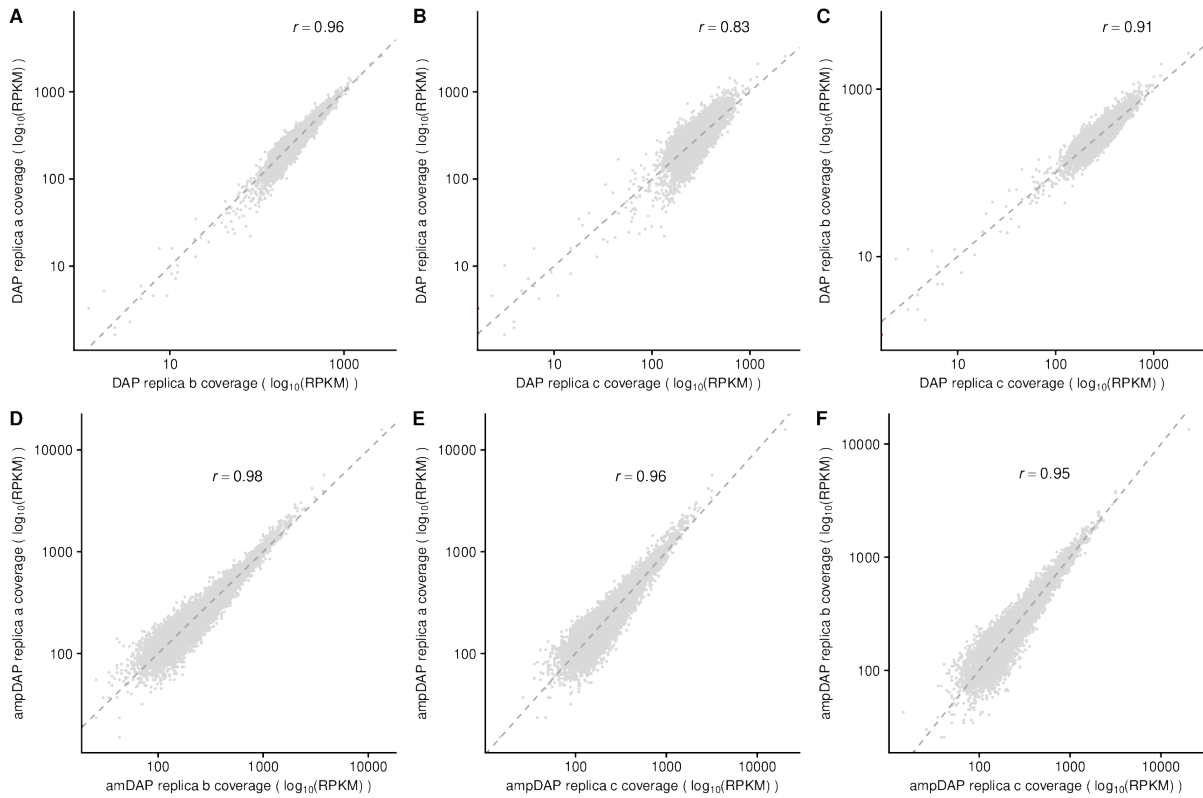

827

828

829 **Supplementary Figure 1: Replicate reproducibility of LFY DAP-seq experiments.**

830 Scatter plots of coverage, normalized by the total number of reads in peaks, between three

831 replicates (a,b,c) of DAP-seq (first row) and amplified DAP-seq (second row) experiments, with

832 Pearson's correlation at top.

833

834

835

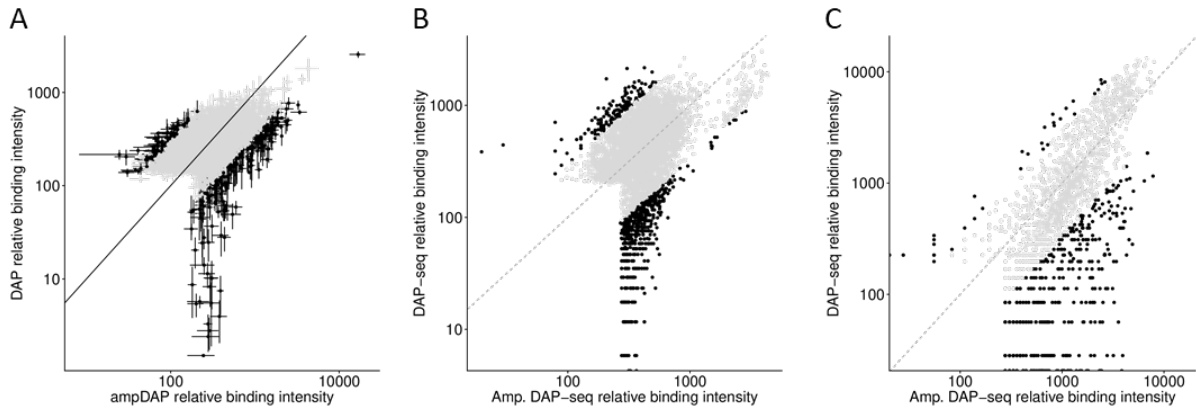

836

837 **Supplementary Figure 2: Relative binding intensity for ampDAP-seq and DAP-seq**  
838 **experiments for LFY (A), ERF07(AT1G19210) (B), and a trihelix-domain containing protein**  
839 **(AT3G10030) (C).**

840 The relative binding intensity is expressed as the number of reads in the bound region  
841 normalized by its length and by the total number of reads in all bound regions. Black and grey  
842 separate bound regions with a difference in relative binding intensity of ampDAP versus DAP-  
843 seq experiment greater and less than 3-fold. Variability across replicates (available for LFY  
844 only) is represented by error bars.

845

846

A

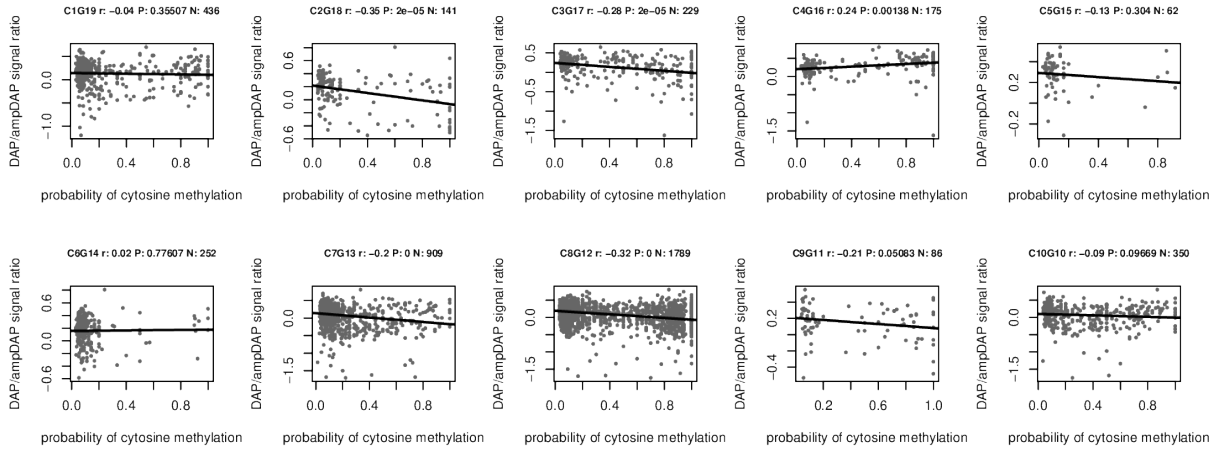

847

848

B

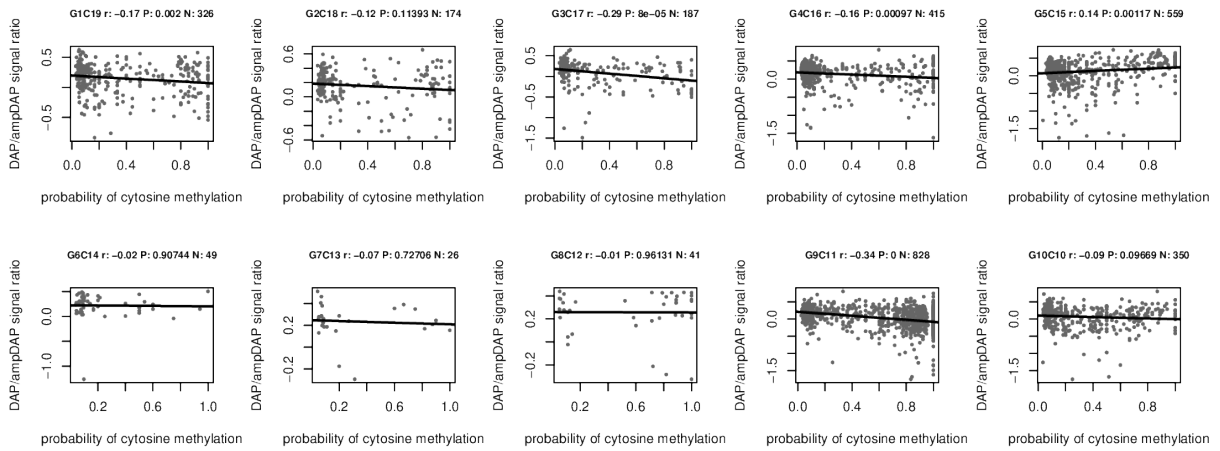

849

850

851 **Supplementary Figure 3: Effect of methylation of each individual position on LFY binding.**

852 Relation between methylation probability at a single site in the predicted best LFY binding

853 site and the log<sub>10</sub>-scaled relative binding site intensity of a DAP-seq versus an ampDAP-seq

854 experiment for LFY on the forward (A) and reverse (B) strand.

855

856



857

A

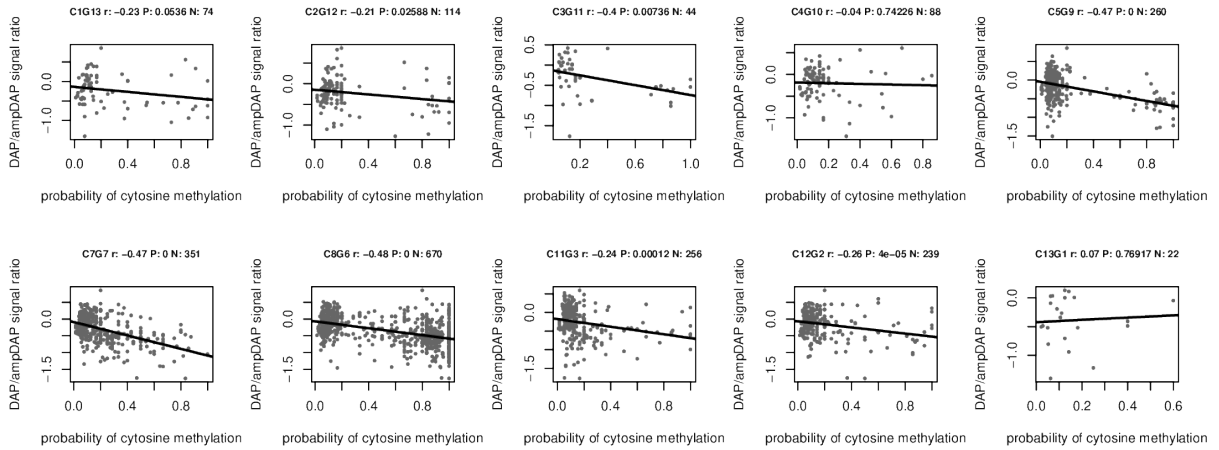

858

859

B

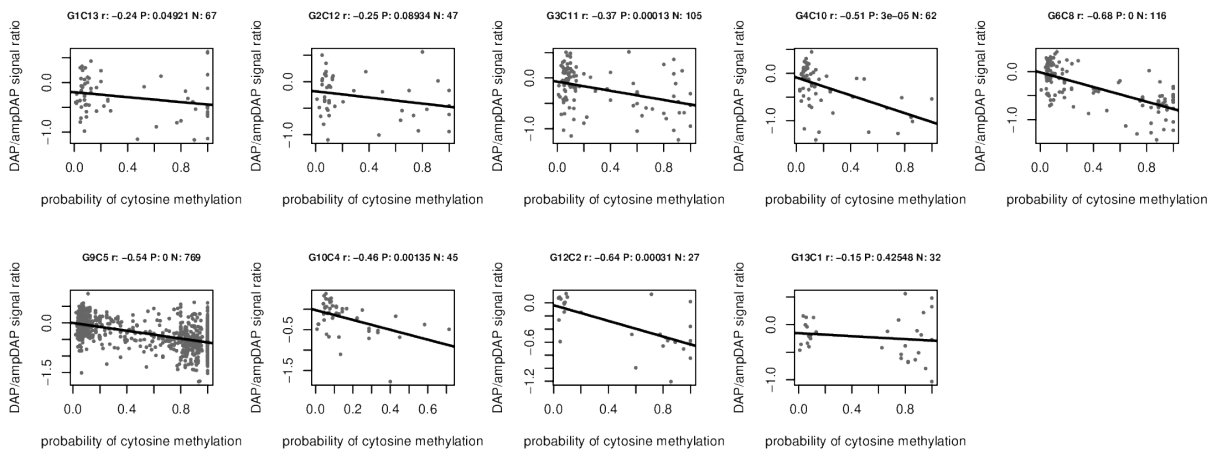

860

861

862 **Supplementary Figure 4: Effect of methylation of each individual position on ERF017**

863 **binding.**

864 Relation between methylation probability at a single site in the predicted best binding site

865 and the log<sub>10</sub>-scaled relative binding site intensity of a DAP-seq versus an ampDAP-seq

866 experiment for ERF017 (At1g19210) on the forward (A) and reverse (B) strand.

867

868

A

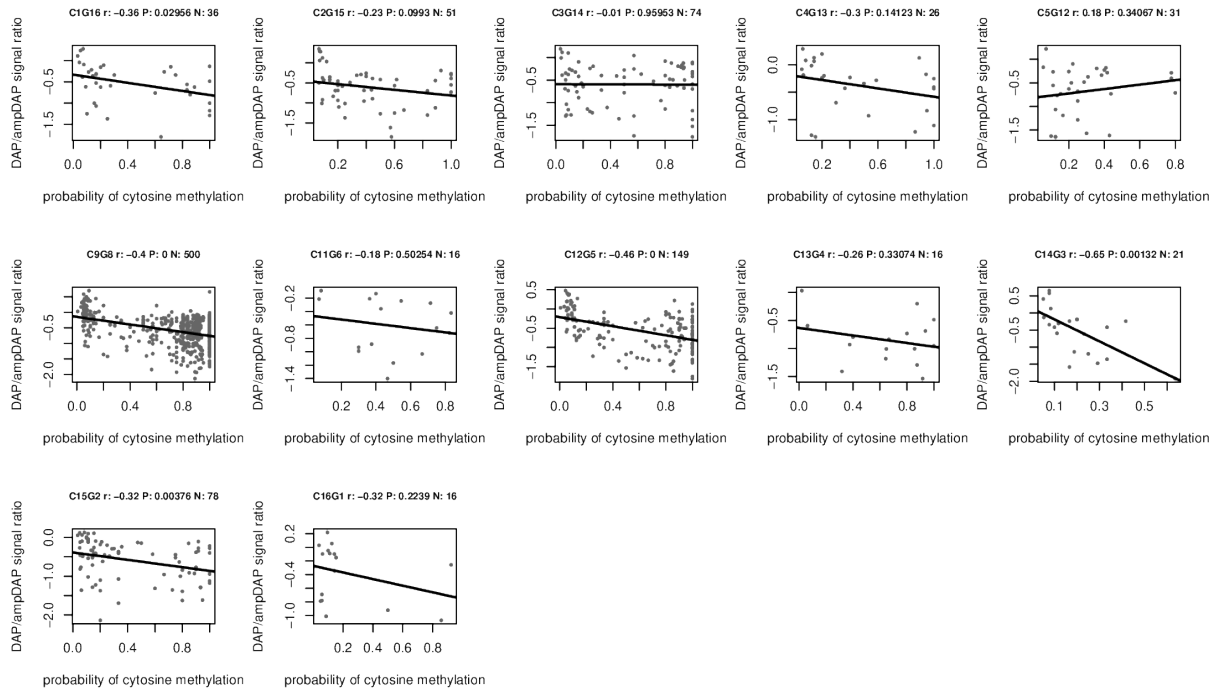

870

871

B

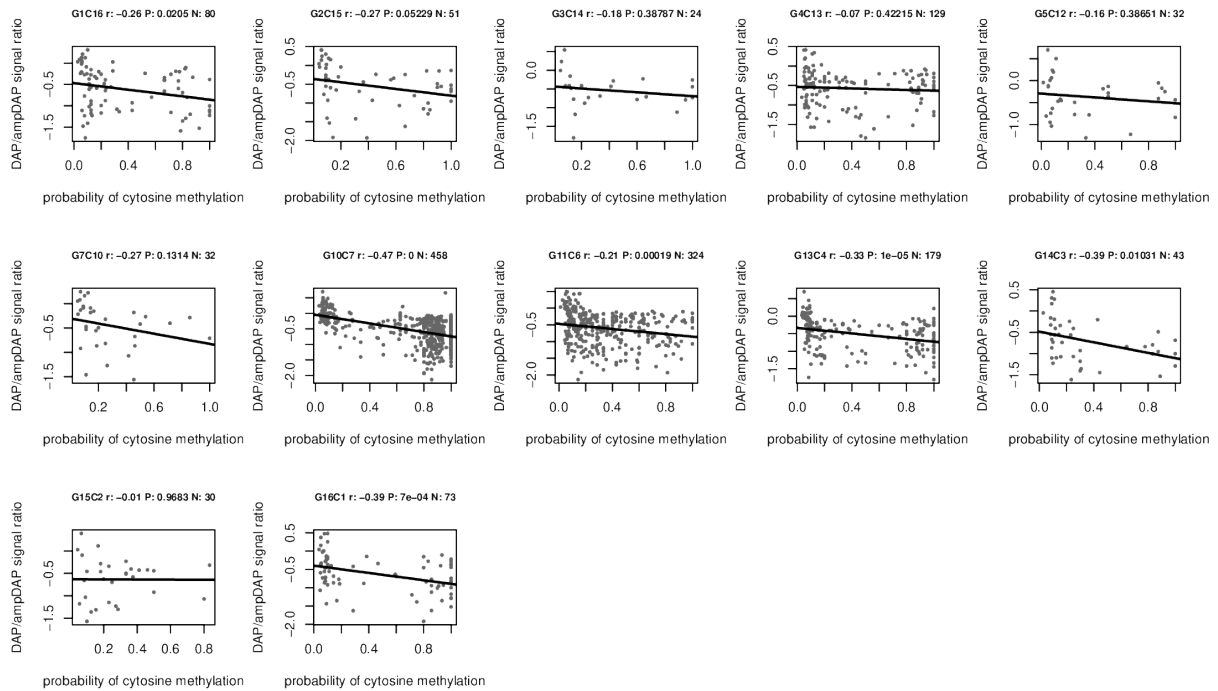

872

### 873 **Supplementary Figure 5: Effect of methylation of each individual position on trihelix-** 874 **domain containing protein (AT3G10030) binding.**

875 Relation between methylation probability at a single site in the predicted best binding site  
 876 and the log<sub>10</sub>-scaled relative binding site intensity of a DAP-seq versus an ampDAP-seq  
 877 experiment for trihelix-domain containing protein (AT3G10030) on the forward (A) and  
 878 reverse (B) strand.

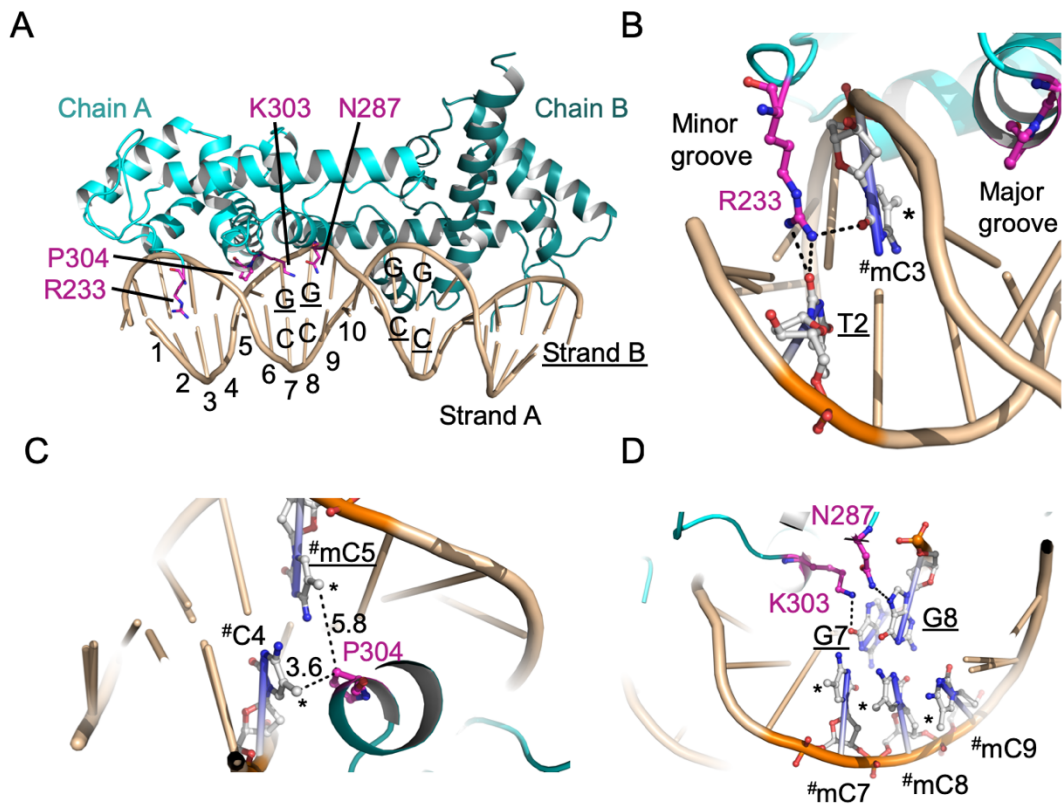

879

880 **Supplementary Figure 6. Structural features suggesting that LFY is intrinsically only mildly**  
 881 **sensitive to cytosine methylation.**

882 (A) Overview of LFY-DBD dimer (Chain A and B) bound to DNA sequence from *AP1* promoter  
 883 (PDB 2vy1); Residues involved in base readout are highlighted in pink. LFY binding sequence  
 884 is pseudo-palindromic and composed of two half-sites. One half-site is numbered from 1 to  
 885 10 with position 10 being the center of the pseudo-palindrome. The two DNA strands are  
 886 designated as strand A and strand B (underlined), respectively. The highly conserved CG base  
 887 pairs in both strands are annotated (bases from strand B are underlined). (B) Base readout  
 888 residue R233 interacts with bases from position 2 and 3 in the minor groove. C3 is mutated to  
 889 methylated cytosine, designated as #mC3 (# stands for mutation). Its methyl group facing the  
 890 major groove, thus would not interfere with R233 base readout interactions. (C) Methylation  
 891 of cytosine in position 4 (strand A) or position 5 (strand B) helps LFY binding by forming  
 892 hydrophobic interaction between methyl groups and C $\beta$  of P308; The methyl groups are in  
 893 close proximity to P304. Distances are measured based on mutation done in the model of PDB  
 894 2vy1. (D) C7, C8, and C9 are mutated to mCs. Their methyl groups are distant from N287 and  
 895 K303 (>8 Å), thus are unlikely to interfere with the base readout interactions. The base readout  
 896 interactions are indicated by black dash lines. Methyl groups are indicated by \*. A base marked

897 with # stands for a mutated base relative to the native structure. It has to be noted that the  
898 methylation pattern in the figure is to visualize their relative position to key base readout  
899 residues, they might not occur *in vivo*, e.g., the three continuum mC in (D).  
900

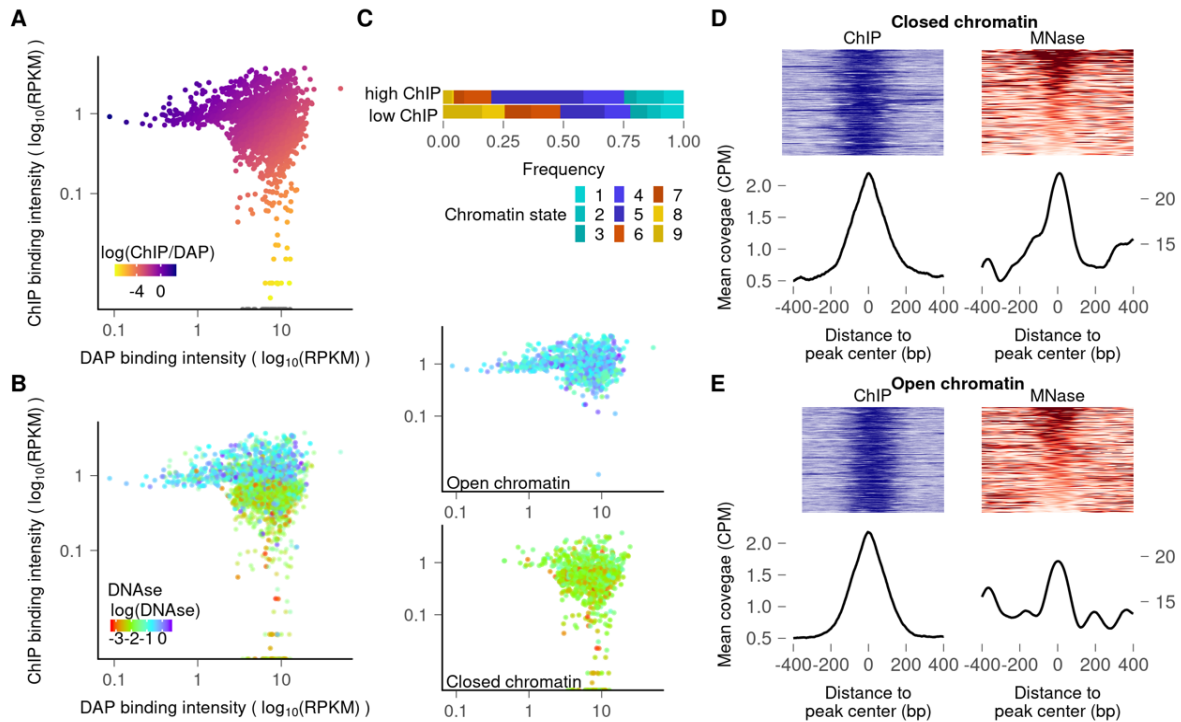

901

902 **Supplementary Figure 7: Interaction between LFY and closed chromatin regions in**

903 **inflorescence tissues**

904 (A) Plots comparing the LFY binding intensities in ChIP-seq (inflorescence tissue of *35S::LFY-*

905 *GR ap1 cal*; Goslin et al., 2017) vs DAP-seq experiments. The heatmap is based on the ChIP-

906 seq/DAP-seq intensity ratio. (B) Overlay of DNaseI signal (heat map) on LFY bound regions,

907 with DAP-seq (X-axis) and ChIP-seq (Y-axis) peak coverages. The two panels on the right show

908 the same regions split into open (upper panel) and closed (lower panel) chromatin states. (C)

909 Distribution of chromatin states 1 to 9 according to (Sequeira-Mendes et al., 2014) for the first

910 and last decile of LFY bound regions based on the ChIP-seq signal. (D-E) MNase signal around

911 ChIP-seq peak centers in closed (D) or open (E) chromatin regions. Upper panels show ChIP-

912 seq and MNase-seq coverage for each peak ordered based on the MNase-seq signal. Lower

913 panels represent the mean coverage.

914

915

916

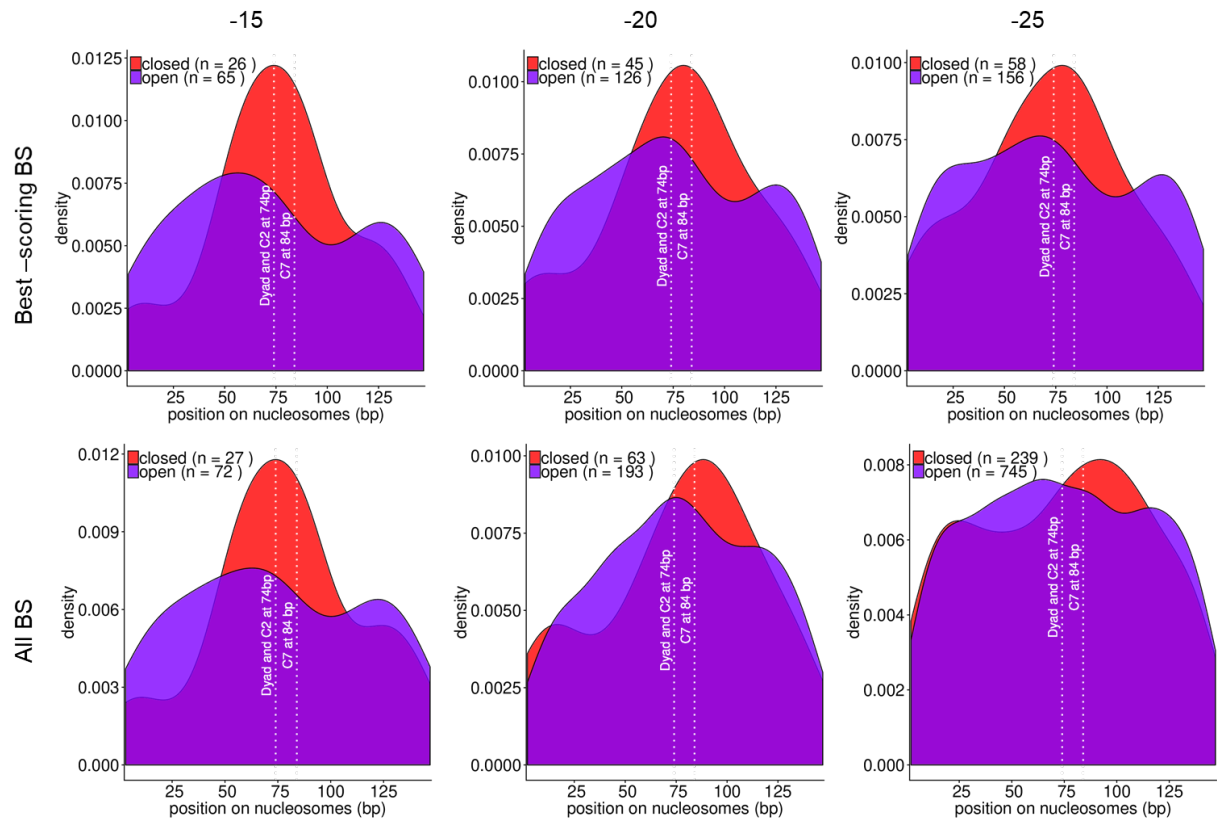

917

918 **Supplementary Figure 8: Density plots of LFY binding sites (BS) central position on**  
 919 **nucleosomes in open and closed chromatin for flower tissues.**

920 Plots are shown for BS with a score greater than -15 (left), -20 (middle), and -25 (right), for  
 921 best-scoring BS only (top), and all BS above the score threshold (bottom).

922

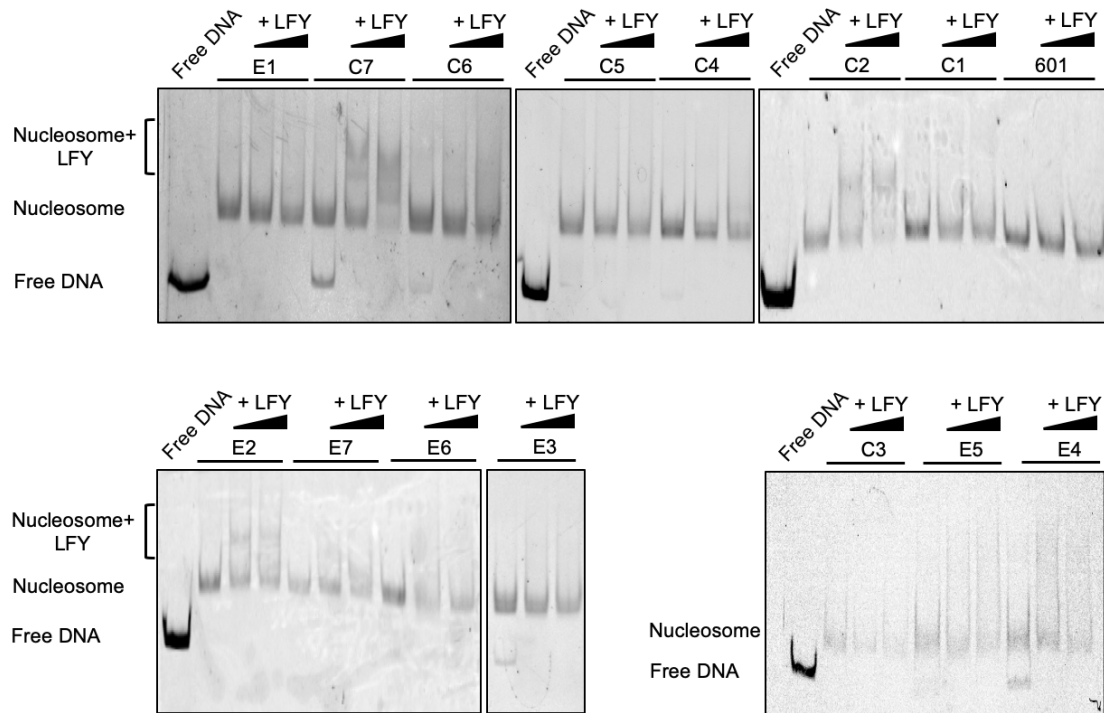

923

924 **Supplementary Figure 9: LFY nucleosomal DNA binding assayed by EMSA using 601**  
 925 **sequences with a LFYBS inserted at different positions.**

926 The positions of LFYBS in the 601 sequence are illustrated in Figure 3B and their sequences  
 927 are given in Table S2. Two concentrations of LFY (250 nM and 1  $\mu$ M) were used. LFY binds to  
 928 nucleosomes with a LFYBS at C2 and C7 positions; There is also weak binding at E2 but it is  
 929 weak and less reproducible.

930

931

932

933

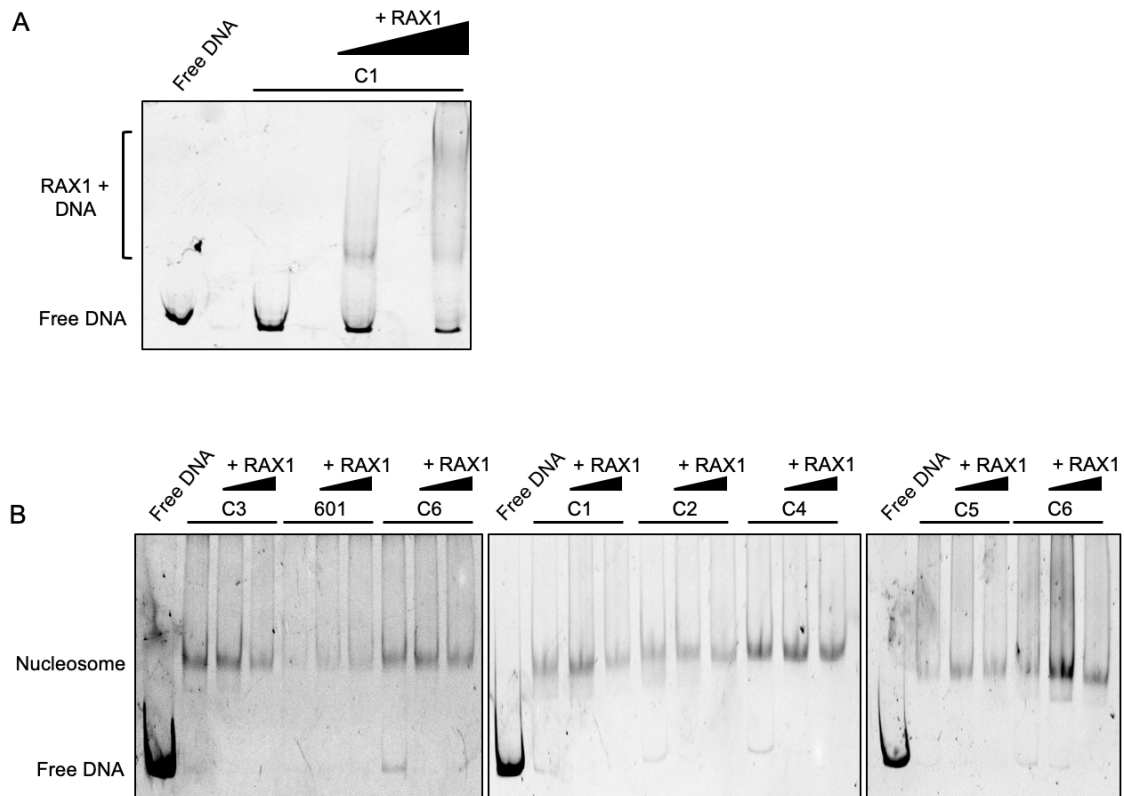

934

935 **Supplementary Figure 10: EMSA testing RAX1 nucleosomal DNA binding on 601 sequence**  
 936 **with a RAX binding site inserted at different positions.**

937 (A) EMSA with different concentrations of RAX1 (250 nM and 1  $\mu$ M) and free 601 DNA with a  
 938 RAX1 binding site showing that recombinant RAX1 protein is active. (B) EMSA with RAX1 (250  
 939 nM and 1  $\mu$ M) and 601 nucleosomes without or with a RAX1 binding site inserted at different  
 940 positions), showing that RAX1 has no nucleosomal DNA binding activity. RAX1 binding site  
 941 insertion in 601 sequences follows the same principle as for LFYBS illustrated in Figure 3B.  
 942 DNA sequences are given in Table S3.

943

944

945



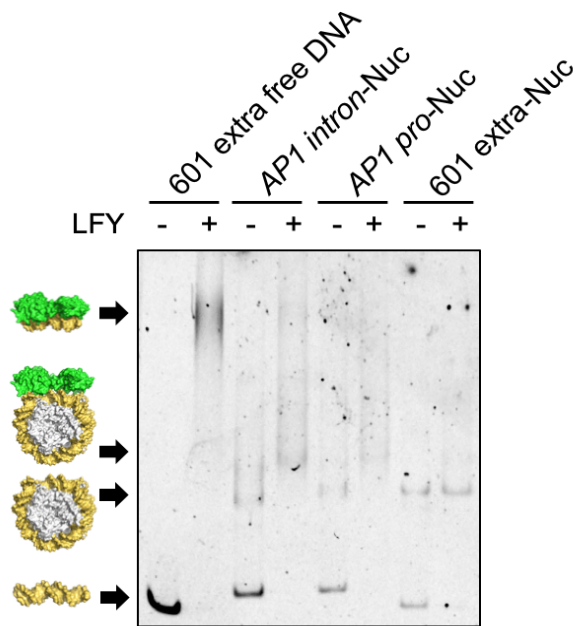

946

947 **Supplementary Figure 11: LFY binds nucleosomes assembled with *AP1* intron and promoter**  
 948 **sequences (related to Figure 3E).**

949 Free DNA or reconstructed nucleosomes are indicated on top of the lanes. The mention extra  
 950 indicates that the sequence used is longer due to the presence of the amplification primers  
 951 used for *AP1* sequences (see table 2). The last two lanes are controls showing that these extra  
 952 sequences do not bind to LFY. Arrows and drawings on the side indicate from bottom to up  
 953 are free DNA, nucleosome alone, LFY nucleosome complex, and free DNA LFY complex.

954

955

956 **Supplementary Table 1.**

957 Mapping and peak calling statistics of DAP-seq and ampDAP-seq experiments

958

| Study                                                                                                                                                                                                                                                                                  | Transcription factor | Library    | DNA           | Read type | #Raw reads | IS (bp) | #Mapped reads | Mapping rate (%) | #Filtered reads | #Peaks (MACS2) | #Consensus peaks (MSPC) | Filtered peaks* | #RC in filtered peaks | FRIP |
|----------------------------------------------------------------------------------------------------------------------------------------------------------------------------------------------------------------------------------------------------------------------------------------|----------------------|------------|---------------|-----------|------------|---------|---------------|------------------|-----------------|----------------|-------------------------|-----------------|-----------------------|------|
| This work                                                                                                                                                                                                                                                                              | Control              | LIB1-1     | Amplified     | PE        | 22535270   | 249     | 10850451      | 48               | 9449616         | NA             | NA                      | NA              | NA                    | NA   |
|                                                                                                                                                                                                                                                                                        | LFY (AT5G61850)      | LIB11-13   | Amplified     | PE        | 21094694   | 171     | 7515152       | 36               | 6266961         | 8692           | 4791                    | 9116            | 1467226               | 0.23 |
|                                                                                                                                                                                                                                                                                        |                      | LIB11-14   |               | PE        | 16661008   | 194     | 6005517       | 36               | 5059651         | 7656           |                         |                 | 1145546               | 0.23 |
|                                                                                                                                                                                                                                                                                        |                      | LIB11-15   |               | PE        | 15667010   | 191     | 5132935       | 33               | 4480885         | 5553           |                         |                 | 8350426               | 0.19 |
|                                                                                                                                                                                                                                                                                        |                      | 2LIB11-20  | Non amplified | PE        | 74147498   | 170     | 32781695      | 44               | 20940972        | 29365          | 20760                   |                 | 7474969               | 0.36 |
|                                                                                                                                                                                                                                                                                        |                      | 2LIB11-21  |               | PE        | 42482466   | 180     | 18406436      | 43               | 13795444        | 29641          |                         |                 | 4208232               | 0.31 |
|                                                                                                                                                                                                                                                                                        |                      | 2LIB11-22  |               | PE        | 29556830   | 203     | 13689955      | 46               | 10729125        | 29910          |                         |                 | 3134403               | 0.29 |
| Re-mapping of O'Malley et al 2016                                                                                                                                                                                                                                                      | Control              | SRR2926068 | Non amplified | PE        | 8482778    | NA      | 4002772       | 47               | 586857          | NA             | NA                      | NA              | NA                    | NA   |
|                                                                                                                                                                                                                                                                                        | ERF017 (AT1G19210)   | SRX1412012 | Amplified     | SE        | 3628476    | NA      | 1432383       | 39               | 1432383         | 4786           | NA                      | 5266            | 253696                | 0.18 |
|                                                                                                                                                                                                                                                                                        |                      | SRX1412013 | Non amplified | SE        | 8258696    | NA      | 674974        | 8                | 674974          | 8959           | NA                      |                 | 428658                | 0.64 |
|                                                                                                                                                                                                                                                                                        | Trihelix (AT3G10030) | SRX1412646 | Amplified     | SE        | 1327104    | NA      | 490155        | 37               | 490155          | 1762           | NA                      | 1653            | 90280                 | 0.18 |
|                                                                                                                                                                                                                                                                                        |                      | SRX1412647 | Non amplified | SE        | 998448     | NA      | 352811        | 35               | 352811          | 806            | NA                      |                 | 88665                 | 0.25 |
| *Peaks with RPKM>3 (all transcription factors) and maximum height greater than 10 (LFY) in the consensus DAP-seq or amplified DAP-seq experiment were merged. PE, paired-end. SE, single-end. IS, mean insert size. FRIP, the fraction of filtered reads in peaks. NA, not applicable. |                      |            |               |           |            |         |               |                  |                 |                |                         |                 |                       |      |

959

960

961 **Supplementary Table 2.**

962 DNA sequences used for nucleosome reconstruction with LFY binding site underlined

963

| DESCRIPTION                                    | SEQUENCE                                                                                                                                                                                                                 |
|------------------------------------------------|--------------------------------------------------------------------------------------------------------------------------------------------------------------------------------------------------------------------------|
| <b>Widom 601 sequence</b>                      | ATCGATGTATATATCTGACACGTGCCTGGAGACTAGGGAGTAATCCCCTTGGCGGTAAAACGCGGGGGACAGCGCGTACGTGCGTTTAAGCGGTGCTAGAGCTGTCTACGACCAATTGAGCGGCCTCGGCACCGGGATTCTGAT                                                                         |
| <b>LFY-C1 (LFY binding site is underlined)</b> | ATCGATGTATATATCTGACACGTGCCTGGAGACTAGGGAGTAATCCCCTTGGCGGTAAAACATTGACCAgCGGGTAATTGTCGTTTAAGCGGTGCTAGAGCTGTCTACGACCAATTGAGCGGCCTCGGCACCGGGATTCTGAT                                                                          |
| <b>LFY-C2</b>                                  | ATCGATGTATATATCTGACACGTGCCTGGAGACTAGGGAGTAATCCCCTTGGCGGTAAAACGCATTGACCAgCGGGTAATTGCGTTTAAGCGGTGCTAGAGCTGTCTACGACCAATTGAGCGGCCTCGGCACCGGGATTCTGAT                                                                         |
| <b>LFY-C3</b>                                  | ATCGATGTATATATCTGACACGTGCCTGGAGACTAGGGAGTAATCCCCTTGGCGGTAAAACGCGCATTGACCAgCGGGTAATTGTTTAAGCGGTGCTAGAGCTGTCTACGACCAATTGAGCGGCCTCGGCACCGGGATTCTGAT                                                                         |
| <b>LFY-C4</b>                                  | ATCGATGTATATATCTGACACGTGCCTGGAGACTAGGGAGTAATCCCCTTGGCGGTAAAACGCGGGCATTGACCAgCGGGTAATTGTAAGCGGTGCTAGAGCTGTCTACGACCAATTGAGCGGCCTCGGCACCGGGATTCTGAT                                                                         |
| <b>LFY-C5</b>                                  | ATCGATGTATATATCTGACACGTGCCTGGAGACTAGGGAGTAATCCCCTTGGCGGTAAAACGCGGGGGCATTGACCAgCGGGTAATTGAGCGGTGCTAGAGCTGTCTACGACCAATTGAGCGGCCTCGGCACCGGGATTCTGAT                                                                         |
| <b>LFY-C6</b>                                  | ATCGATGTATATATCTGACACGTGCCTGGAGACTAGGGAGTAATCCCCTTGGCGGTAAAACGCGGGGGACCAATTGACCAgCGGGTAATTGCGGTGCTAGAGCTGTCTACGACCAATTGAGCGGCCTCGGCACCGGGATTCTGAT                                                                        |
| <b>LFY-C7</b>                                  | ATCGATGTATATATCTGACACGTGCCTGGAGACTAGGGAGTAATCCCCTTGGCGGTAAAACGCGGGGGACAGCATTGACCAgCGGGTAATTGGTCTAGAGCTGTCTACGACCAATTGAGCGGCCTCGGCACCGGGATTCTGAT                                                                          |
| <b>LFY-E1</b>                                  | ATCGATGTATATATCTGACACGTGCCTGGAGACTAGGGAGTAATCCCCTTGGCGGTAAAACGCGGGGGACAGCGCGTACGCATTGACCAgCGGGTAATTGTCGTCTACGACCAATTGAGCGGCCTCGGCACCGGGATTCTGAT                                                                          |
| <b>LFY-E2</b>                                  | ATCGATGTATATATCTGACACGTGCCTGGAGACTAGGGAGTAATCCCCTTGGCGGTAAAACGCGGGGGACAGCGCGTACGTGCATTGACCAgCGGGTAATTGTCTACGACCAATTGAGCGGCCTCGGCACCGGGATTCTGAT                                                                           |
| <b>LFY-E3</b>                                  | ATCGATGTATATATCTGACACGTGCCTGGAGACTAGGGAGTAATCCCCTTGGCGGTAAAACGCGGGGGACAGCGCGTACGTGCGCATTGACCAgCGGGTAATTGTCTACGACCAATTGAGCGGCCTCGGCACCGGGATTCTGAT                                                                         |
| <b>LFY-E4</b>                                  | ATCGATGTATATATCTGACACGTGCCTGGAGACTAGGGAGTAATCCCCTTGGCGGTAAAACGCGGGGGACAGCGCGTACGTGCGTTTATTGACCAgCGGGTAATTGTACGACCAATTGAGCGGCCTCGGCACCGGGATTCTGAT                                                                         |
| <b>LFY-E5</b>                                  | ATCGATGTATATATCTGACACGTGCCTGGAGACTAGGGAGTAATCCCCTTGGCGGTAAAACGCGGGGGACAGCGCGTACGTGCGTTTACATTGACCAgCGGGTAATTGCGACCAATTGAGCGGCCTCGGCACCGGGATTCTGAT                                                                         |
| <b>LFY-E6</b>                                  | ATCGATGTATATATCTGACACGTGCCTGGAGACTAGGGAGTAATCCCCTTGGCGGTAAAACGCGGGGGACAGCGCGTACGTGCGTTTAAGCATTGACCAgCGGGTAATTGACCAATTGAGCGGCCTCGGCACCGGGATTCTGAT                                                                         |
| <b>LFY-E7</b>                                  | ATCGATGTATATATCTGACACGTGCCTGGAGACTAGGGAGTAATCCCCTTGGCGGTAAAACGCGGGGGACAGCGCGTACGTGCGTTTAAGCGCATTGACCAgCGGGTAATTGCAATTGAGCGGCCTCGGCACCGGGATTCTGAT                                                                         |
| <b>AP1 intron*</b>                             | ATGAAAATAAACAAATTTGATAAAAAGAAAAAAAAAAAAAGAAGAACAGCTGTTGCTTGTGGAGCTAAGTTTGA<br>CCATCGGTAAGAAGCCGATTTTAGGATGGAGTTAATTTCTTTTATGGATCCCAGAGGTCAAAGACTCCCTAC<br>TCAGATTTGACATCTTTGTTTCAGTTTAAATTTCTAAAGTCTTCAGATTTTGTTCGTAGATA |

|                   |                                                                                                                                                                                                                         |
|-------------------|-------------------------------------------------------------------------------------------------------------------------------------------------------------------------------------------------------------------------|
| <b>AP1 pro*</b>   | <i>ATGAAAATAACAATTTGATACTTAAAAATATGAAAATAACAATTTGATTATCGACGTCTCGTGAAGAGAAA</i><br>TGGGTAAGTAACATGTACGGACCACTGGTCCTTCCCAAGTGTCACCTTCGCTTTCATTGACGGCGGAGAT<br>TTCCTGTAGATCTACGAAACAAAATCTGAACCAACCAAAATTCAGATTTTGTTCGTAGA |
| <b>601 extra*</b> | <i>ATGAAAATAACAATTTGATATCGATGTATATATCTGACACGTGCCTGGAGACTAGGGAGTAATCCCCTTGGCGGTTA</i><br>AAACGCGGGGGACAGCGGTACGTGCGTTAAGCGGTGCTAGAGCTGTCTACGACCAATTGAGCGGCCTCGGCACCG<br>GGATTCTGATTCAGATTTTGTTCGTAGA                     |

964 \* indicates sequences for nucleosome reconstruction with extended 5' and 3' ends (italicized)  
965 originating from amplification primers.

966 **Supplementary Table 3.** DNA sequences used for nucleosome reconstruction

967 with RAX1 binding site underlined

968

| DESCRIPTION                                      | SEQUENCE                                                                                                                                                   |
|--------------------------------------------------|------------------------------------------------------------------------------------------------------------------------------------------------------------|
| <b>RAX1-C1 (RAX1 binding site is underlined)</b> | ATCGATGTATATATCTGACACGTCCTGGAGACTAGGGAGTAATCCCCTGGCGGTAAAATTGGGTACCTAACTTCT<br><u>AA</u> TGCGTTTAAGCGGTGCTAGAGCTGTCTACGACCAATTGAGCGGCCTCGGCACCGGGATTCTGAT  |
| <b>RAX1-C2</b>                                   | ATCGATGTATATATCTGACACGTCCTGGAGACTAGGGAGTAATCCCCTGGCGGTAAAACGTTGGGTACCTAACTTT<br><u>CTAA</u> CGTTTAAGCGGTGCTAGAGCTGTCTACGACCAATTGAGCGGCCTCGGCACCGGGATTCTGAT |
| <b>RAX1-C3</b>                                   | ATCGATGTATATATCTGACACGTCCTGGAGACTAGGGAGTAATCCCCTGGCGGTAAAACGCGTTGGGTACCTAACT<br><u>TTCTAA</u> TTTAAGCGGTGCTAGAGCTGTCTACGACCAATTGAGCGGCCTCGGCACCGGGATTCTGAT |
| <b>RAX1-C4</b>                                   | ATCGATGTATATATCTGACACGTCCTGGAGACTAGGGAGTAATCCCCTGGCGGTAAAACGCGGGTTGGGTACCTAA<br><u>CTTTCTAA</u> TAAGCGGTGCTAGAGCTGTCTACGACCAATTGAGCGGCCTCGGCACCGGGATTCTGAT |
| <b>RAX1-C5</b>                                   | ATCGATGTATATATCTGACACGTCCTGGAGACTAGGGAGTAATCCCCTGGCGGTAAAACGCGGGGGTTGGGTACCT<br><u>AACTTTCTAA</u> AGCGGTGCTAGAGCTGTCTACGACCAATTGAGCGGCCTCGGCACCGGGATTCTGAT |
| <b>RAX1-C6</b>                                   | ATCGATGTATATATCTGACACGTCCTGGAGACTAGGGAGTAATCCCCTGGCGGTAAAACGCGGGGGACTTGGGTAC<br><u>CTAACTTTCTAA</u> CGGTGCTAGAGCTGTCTACGACCAATTGAGCGGCCTCGGCACCGGGATTCTGAT |
| <b>RAX1-C7</b>                                   | ATCGATGTATATATCTGACACGTCCTGGAGACTAGGGAGTAATCCCCTGGCGGTAAAACGCGGGGGACAGTTGGGT<br><u>ACCTAACTTTCTAA</u> GTGCTAGAGCTGTCTACGACCAATTGAGCGGCCTCGGCACCGGGATTCTGAT |

969

970
